# Supplementary material for: Ultrasmall Nanoparticle Delivery of Doxorubicin Improves Therapeutic Index for High-Grade Glioma
Source: Oxford University Press journal article supplement (doi:10.1158/1078-0432.ccr-21-4053), 2022-05-02
Supplement: ccr-21-4053_supplementary_data_1_suppds1.docx [file ccr-21-4053_supplementary_data_1_suppds1.docx]

Supplementary Materials

Ultrasmall Nanoparticle Delivery of Doxorubicin Improves Therapeutic Index for High-Grade Glioma

Virginia Aragon-Sanabria,1,2† Anusha Aditya,1,2† Li Zhang,1,2† Feng Chen,1,2 Barney Yoo,2,3 Tianye Cao,1,2 Brian Madajewski,1,2 Rachel Lee,2,4 Melik Z. Turker,2,4 Kai Ma,2,4 Sebastien Monette,5 Peiming Chen,1 Jing Wu,3 Shutian Ruan,1 Michael Overholtzer,6,7 Pat Zanzonico,2,8 Charles M. Rudin,2,9 Cameron Brennan,2,10 Ulrich Wiesner,2,4,11‡ Michelle S. Bradbury1,2,12‡

*Corresponding author. M.S. Bradbury, email: [bradburm@mskcc.org](file:///Users/Uli/Downloads/bradburm@mskcc.org), and U. Wiesner, email: [ubw1@cornell.edu](mailto:ubw1@cornell.edu)

**SUPPLEMENTARY FIGURES**


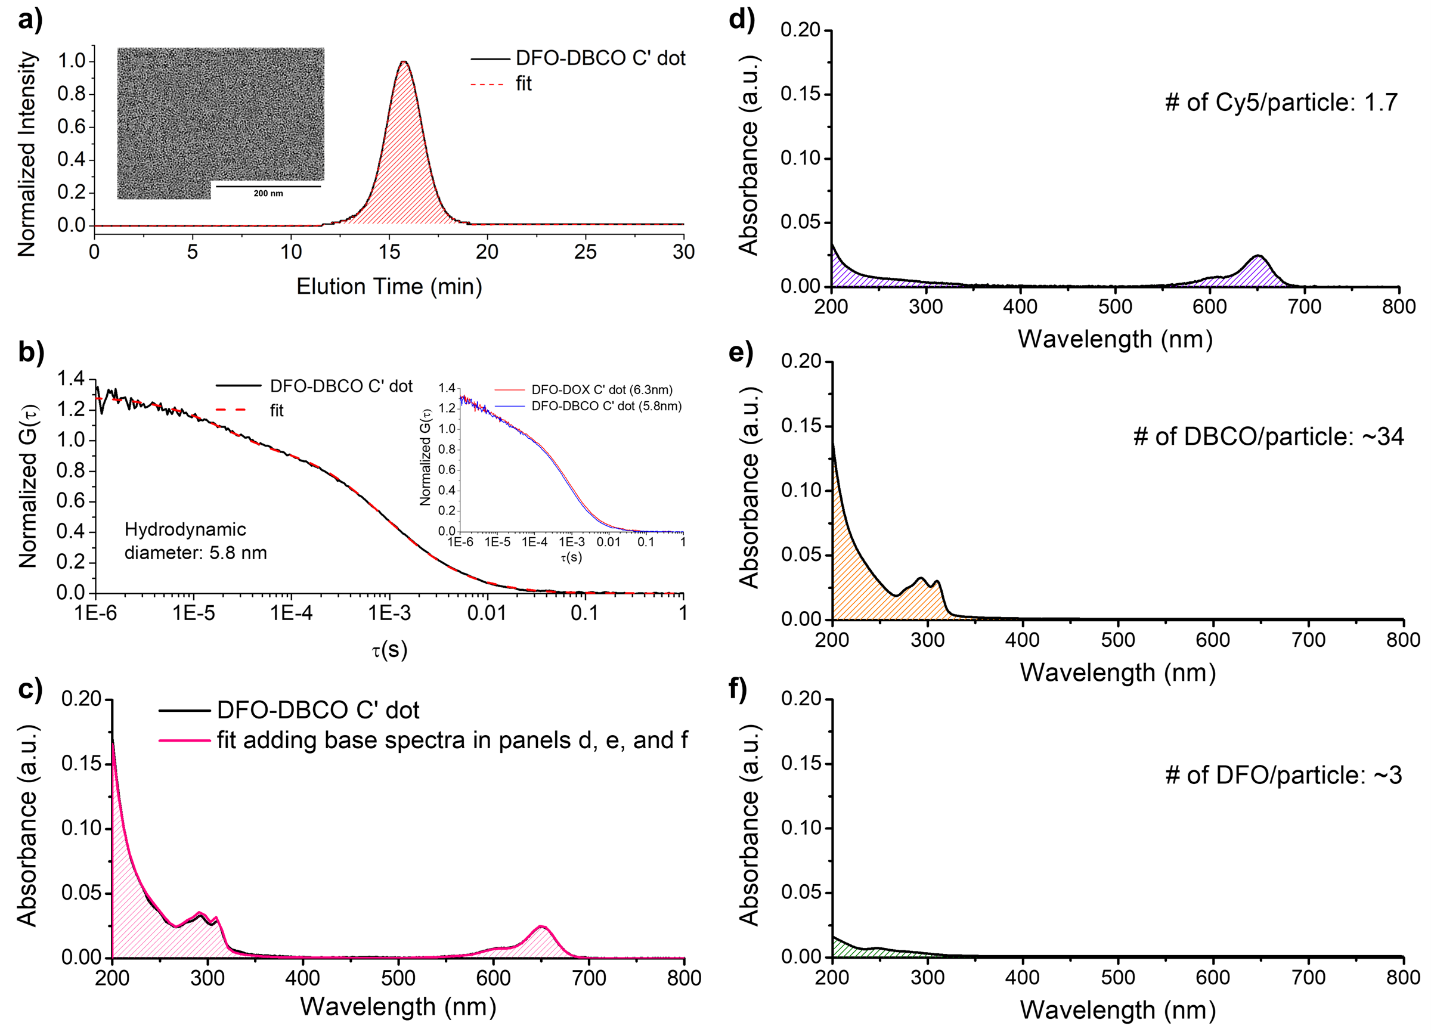


**Fig. S1a. Full characterization data set for DFO-DBCO-C’ dot base particles. (a)** GaussianGPC elution profile of DFO-DBCO-C’ dots. Inset: Representative TEM image of DFO-DBCO C’ dots (scale bar = 200 nm) demonstrating a narrow particle size distribution. (**b)** FCS curve for representative DFO-DBCO-C’ dots together with fit and resulting hydrodynamic particle diameter. Inset: Comparison of FCS curves of base DFO-DBCO C’ dots (blue) and resulting DFO-DOX-C’ dots (red) showing a slight shift to longer times (corresponding to a slightly larger size) for the particle functionalized with drug (i.e. DOX). **(c)** UV/Vis absorbance spectrum of DFO-DBCO C’ dots together with a fit from a superposition of base spectra in panels d-f obtained for (**d**) corresponding unfunctionalized PEG-Cy5-C’ dots, **(e)** DBCO contribution to UV/Vis spectrum of DFO-DBCO-C’dots, and **(f)** DFO contribution to UV/Vis spectrum of DFO-DBCO-C’dots, resulting in estimates of the number of Cy5 dyes, DBCO, and DFO functional moieties per particle (as indicated).


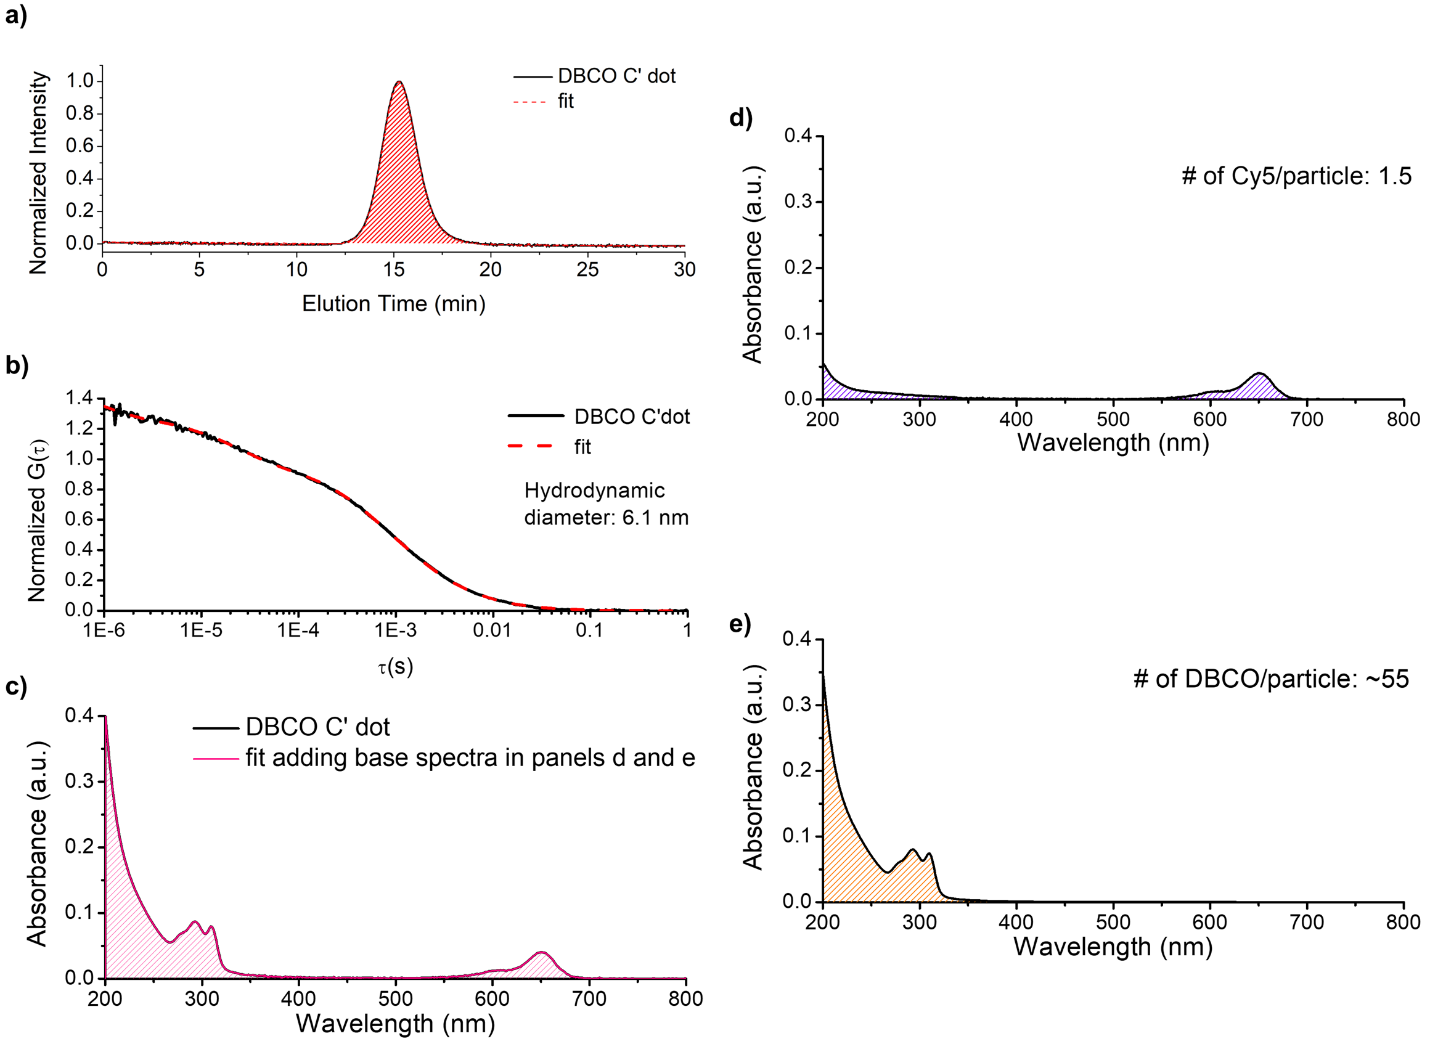


**Fig. S1b. Full characterization data set for DBCO-C’ dot base particles. (a)** GaussianGPC elution profile of DBCO C’ dots (for TEM image see Fig.1d in main text). (**b)** FCS curve for DBCO-C’ dots together with fit and resulting hydrodynamic particle diameter. **(c)** UV/Vis absorbance spectrum of DBCO-C’ dots together with a fit from a superposition of base spectra in panels d and f obtained for **(d**) corresponding unfunctionalized PEG-Cy5-C’ dots,and **(e)** DBCO contribution to spectrum of DBCO-C’dots, resulting in estimates of the number of Cy5 dyes and DBCO functional moieties per particle (as indicated).

**Fig. S2. A schematic illustration of drug-linker conjugation and cleaving process.** The Azido-PEG4-Hydrazone linker-DOX was first reacted with DBCO-C’ dot via the strain-promoted azide-alkyne cycloaddition (SPAAC) reaction to form DOX-C’ dot. Please note, only one of the multiple conjugated drug-linkers was illustrated for simplicity purpose, The Hydrazone linker from the DBCO-C’ dot then undergoes hydrolysis at acidic condition to release the free DOX for cancer killing purpose.

**Fig. S3. A schematic illustration showing the workflow of the current research.** Steps **1** to **5** show the key procedures used for the synthesis of DBCO-PEG-Cy5-C’ dots. Briefly, tetramethyl orthosilicate (TMOS), a silica precursor, and positively charged silane/cyanine 5 (Cy5+) dye conjugates were combined in deionized water at slightly basic conditions under stirring. TMOS, upon the hydrolysis and condensation reactions, form negatively charged ~2 nm sized silica clusters, which aggregate over time by sandwiching the positively charged fluorescent Cy5 dyes in between (**Step 1**). Upon silica cluster/fluorescent dye formations reaching an electrostatically stable size around 6 nm, particle growth stops, and the silica particle surfaces are further coated by PEG-silane molecules for steric stabilization (**Steps 2 & 3**). After the synthesis of the base C’ dot particle platform, amine-silane molecules were added to the solution in order to functionalize the C’ dot surface with primary amines (**Step 4**). Subsequently, the available primary amines on the C’ dot surface were terminated via of DBCO-PEG4-NHS (**Steps 5**) to form DBCO-PEG-Cy5-C’ dot. In order to synthesize drugs for safety and therapeutic efficacy studies, as synthesized DBCO-PEG-Cy5-C’ dot was directedly conjugated with Azido-PEG4-Hydrazone linker-DOX via the highly specific strain-promoted azide-alkyne cycloaddition reaction between DBCO groups on DBCO-C’ dots surface and azide group on the Azido-PEG4-Hydrazone linker-DOX, forming DOX-Hydrazone linker-C’ dots (short for DOX-C’ dots) (**Step 6 & 7**). As synthesized DOX-C’ dot was used for the safety and therapeutic efficacy studies in the selected brain tumor models (**Step 8**). In the case of synthesizing radiolabeled drugs for in vivo PET imaging and biodistribution studies, as synthesized DBCO-PEG-Cy5-C’ dot (with still unreacted primary amine groups) was further functionalized with radioisotope chelators of DFO by reacting with p-SCN-Bn-deferoxamine (or DFO-NCS) molecules, forming DFO-DBCO-PEG-Cy5-C’ dot (short for DFO-DBCO-C’ dot) (**Steps 9**). The same strain-promoted azide-alkyne cycloaddition reaction was followed by reacting DFO-DBCO-C’ dot with Azido-PEG4-Hydrazone linker-DOX to form DFO-DOX- Hydrazone linker-C’ dots (short for DFO-DOX-C’ dots) (**Step 10 & 11**). For 89Zr radiolabeling, DFO-DOX-C’ dots were mixed with 89Zr-oxalate at pH 7-8 (37 oC) to form 89Zr-DFO-DOX-C’ dots (**Step 12**). As synthesized 89Zr-DFO-DOX-C’ dots were used for in vivo biodistribution/mGBM tumor imaging (**Step 13**).

**Fig. S4. PD-10 elution profile and HPLC trace of DBCO-C’ dots and Azido-PEG4-Hydrazone linker-DOX. (a)** The elution profile confirmed that free unreacted Azido-PEG4-Hydrazone linker-DOX should be able to be separated from the DBCO-C’dot or C’ dot-based nanoparticle drug conjugates using the PD-10 desalting column (PBS buffer as the mobile phase).

**(b)**  HPLC chromatograms of the DFO-DOX-C' dots at different wavelengths of interest including 480 nm for the DOX payload (left) and 650 nm for the encapsulated fluorescent Cy5 dye (right).

**Fig. S5. Synthesis of DFO-DOX-C’ dots with varying DPR.** (**a**) The UV-Vis spectra of DFO-DOX-C’ dot with DPRs ranging from zero to ~35.(**b**) The photos of DFO-DOX-C’ dot with increasing DPRs showed the changing of solution color from light blue to dark brown, indicating the successful conjugation of increasing number of DOX molecular per C’ dot.

**Fig. S6. Cellular uptake and cytotoxicity of DOX-C’ dots. (a-c)** LD50 curves generated following exposure ofECLC26 lung cancer cells (**a**), MDA-MB-231 breast cancer cells **(b)**, and PC-3 prostate cancer cells **(c)** to DOX-C’ dots (or DOX NDC) versus free DOX. **(d)** Effect of DOX-C’ dot administration on the proliferation of RCAS-*tv/a* glioma cells. Cells were incubated with 250 nM concentrations of DOX or DOX-C’ dots over time, and the proliferation of cells at each time point were evaluated using the CellTiter-glo assay (Promega) according to manufacturer’s instructions. A proliferation index was calculated by dividing each treatment group’s initial (0 hour) mean luminescence value by values collected at all time points. Statistical comparisons of index values between DOX-C’ dots and vehicle control were performed at each time point using one-way ANOVA followed by post hoc Tukey’s test (*P< .05; **P< .001; ***P< .0001). Data for cellular proliferation were plotted using Prism 7 software (GraphPad). **(e)** Dose-dependent (0–250 nmol/L) uptake of DOX-C’ dots in RCAS-*tv/a* glioma cells.

MDA-MB-231

**Control**

C’ dot

Dox

Merge

C’ dot

Dox

Merge

**DOX-C’ dots**

C’ dot

Dox

Merge


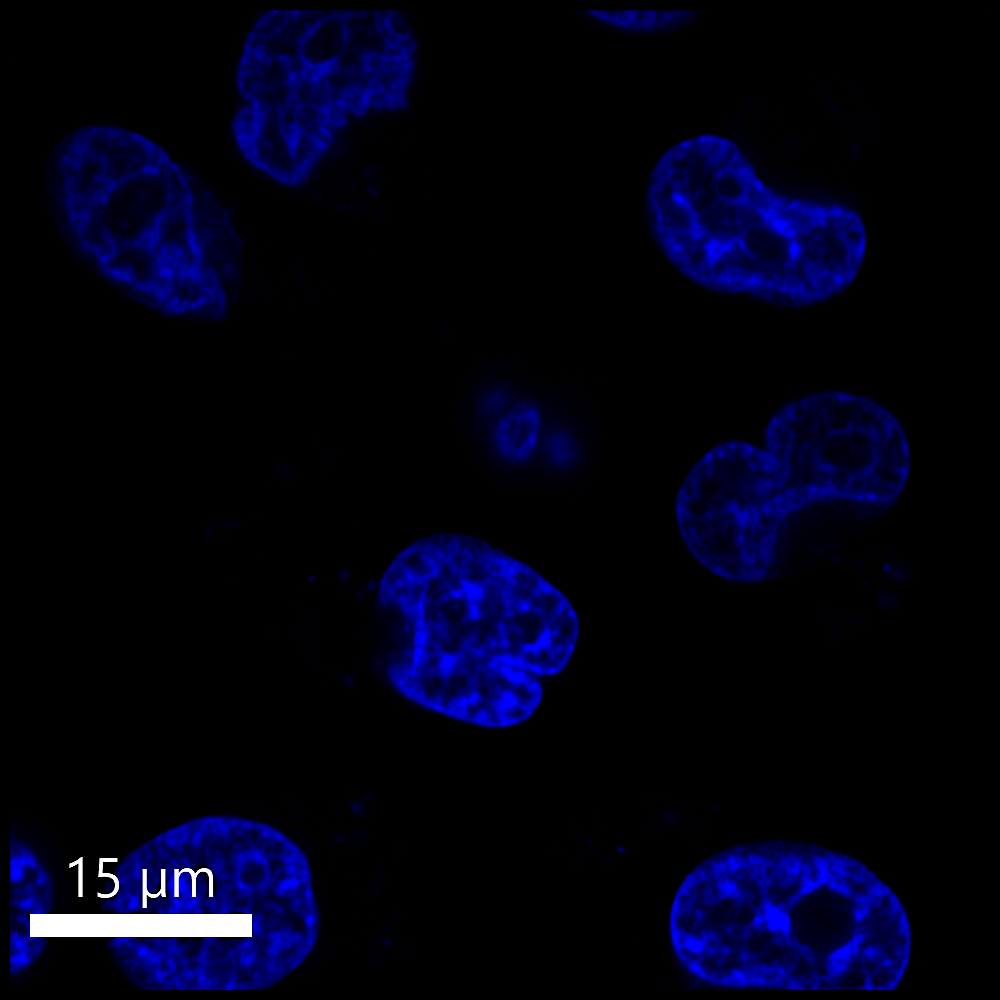

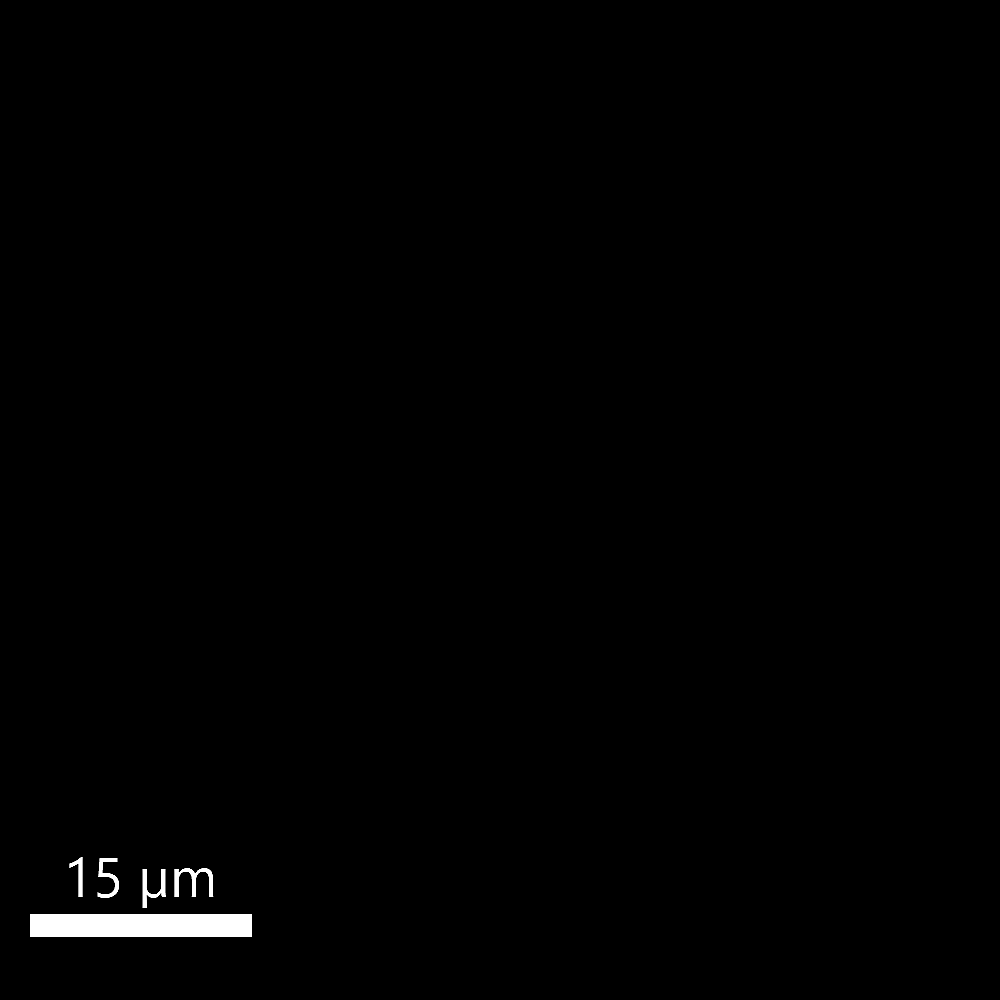

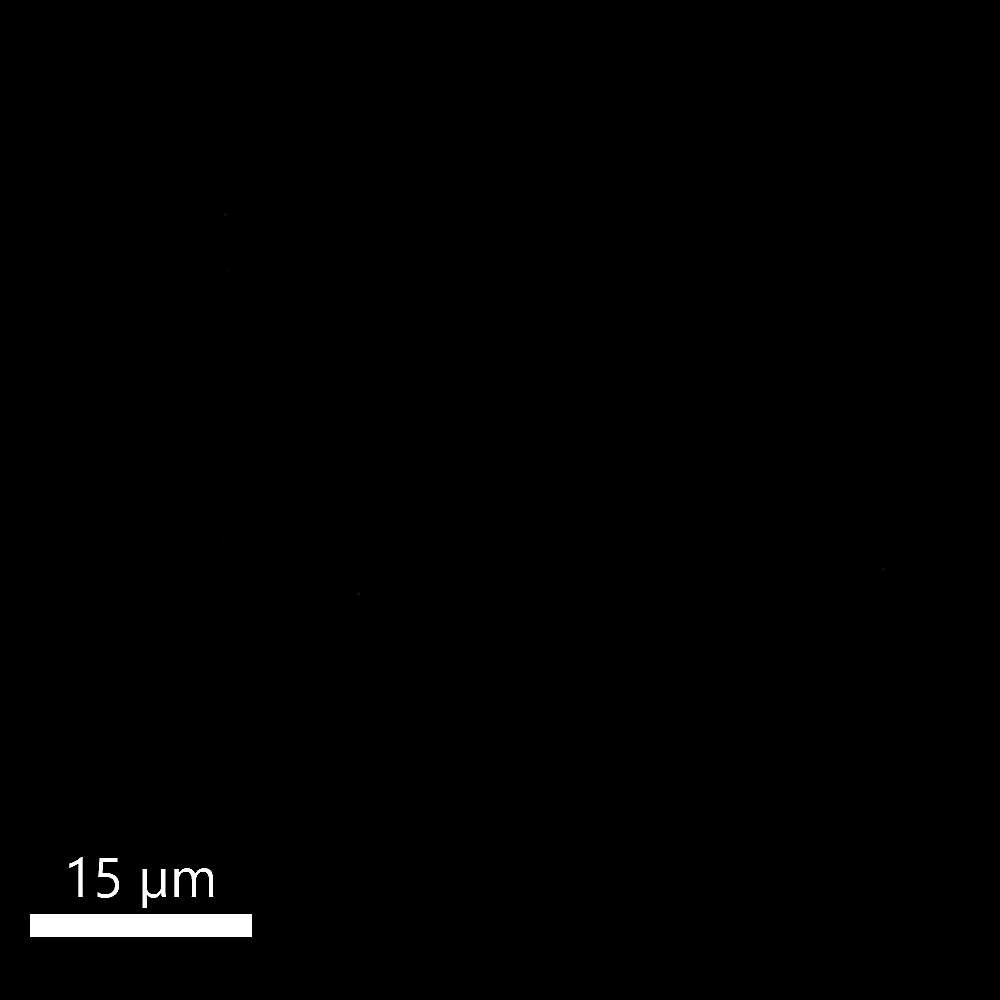

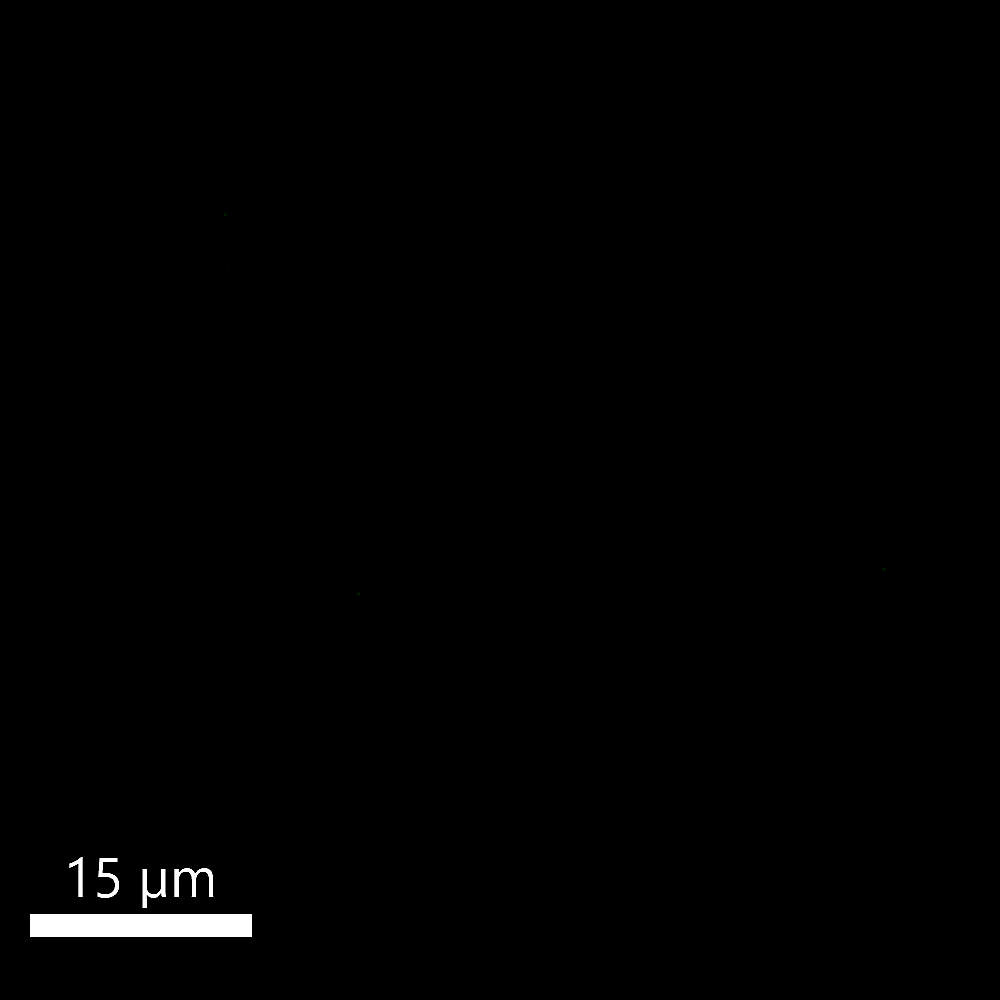

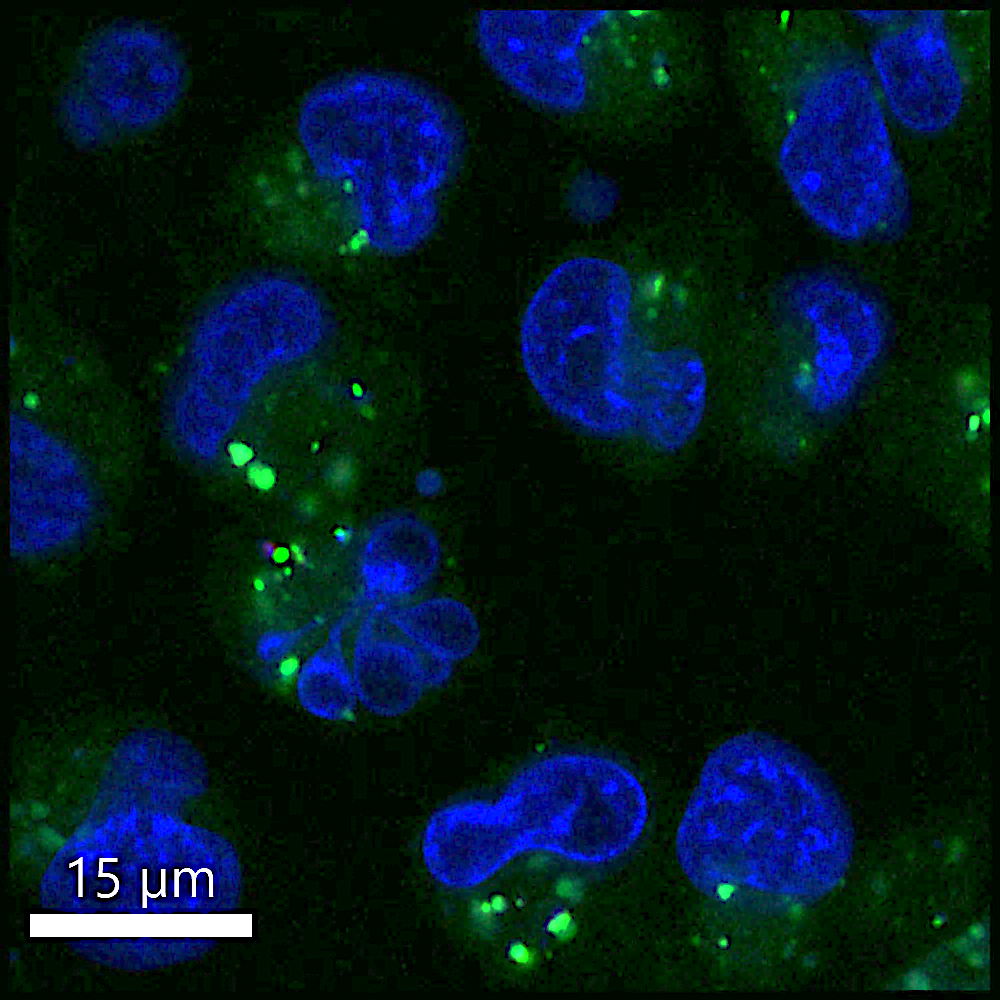

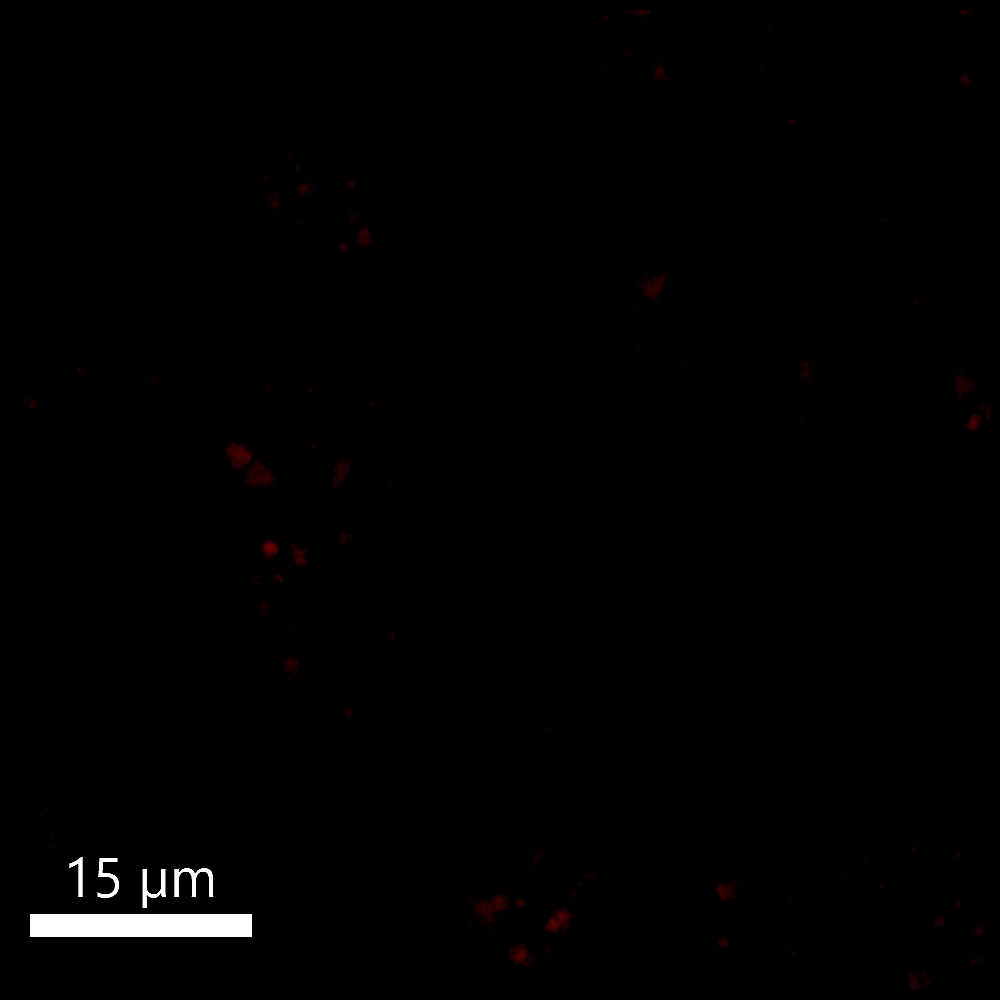

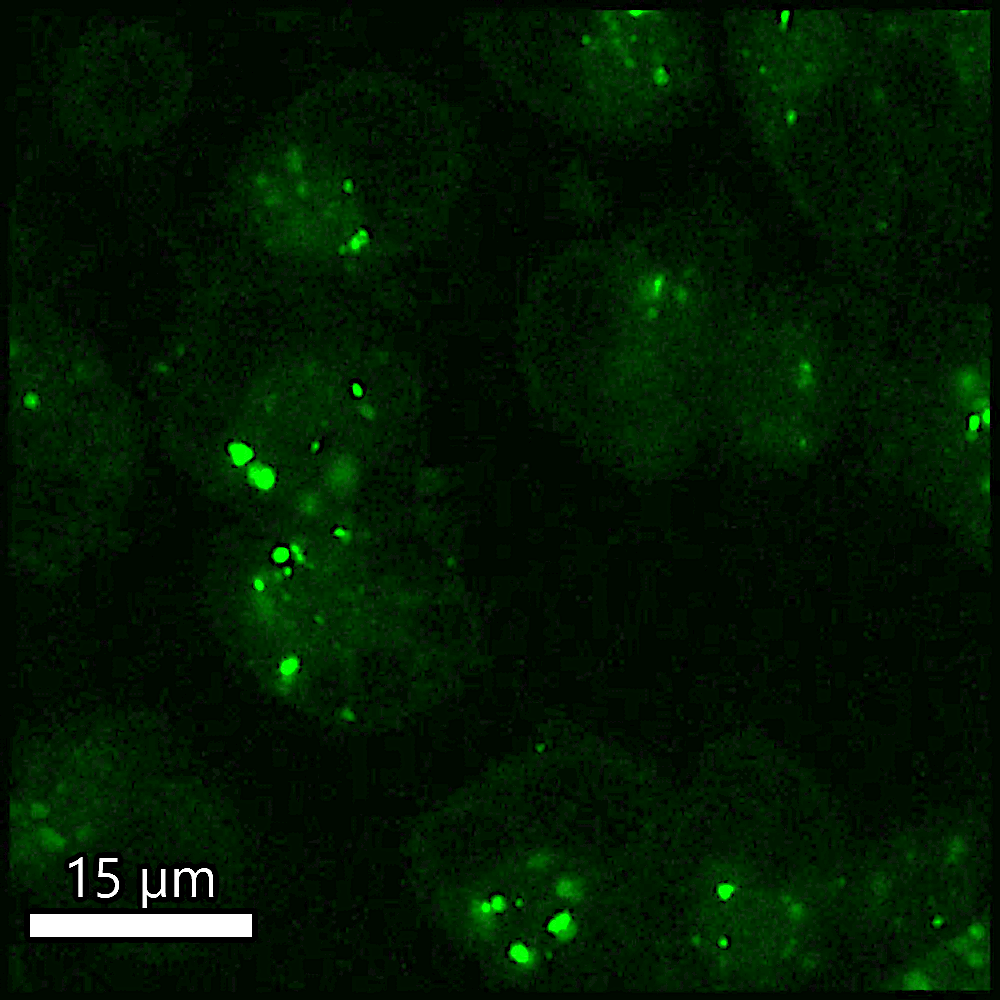

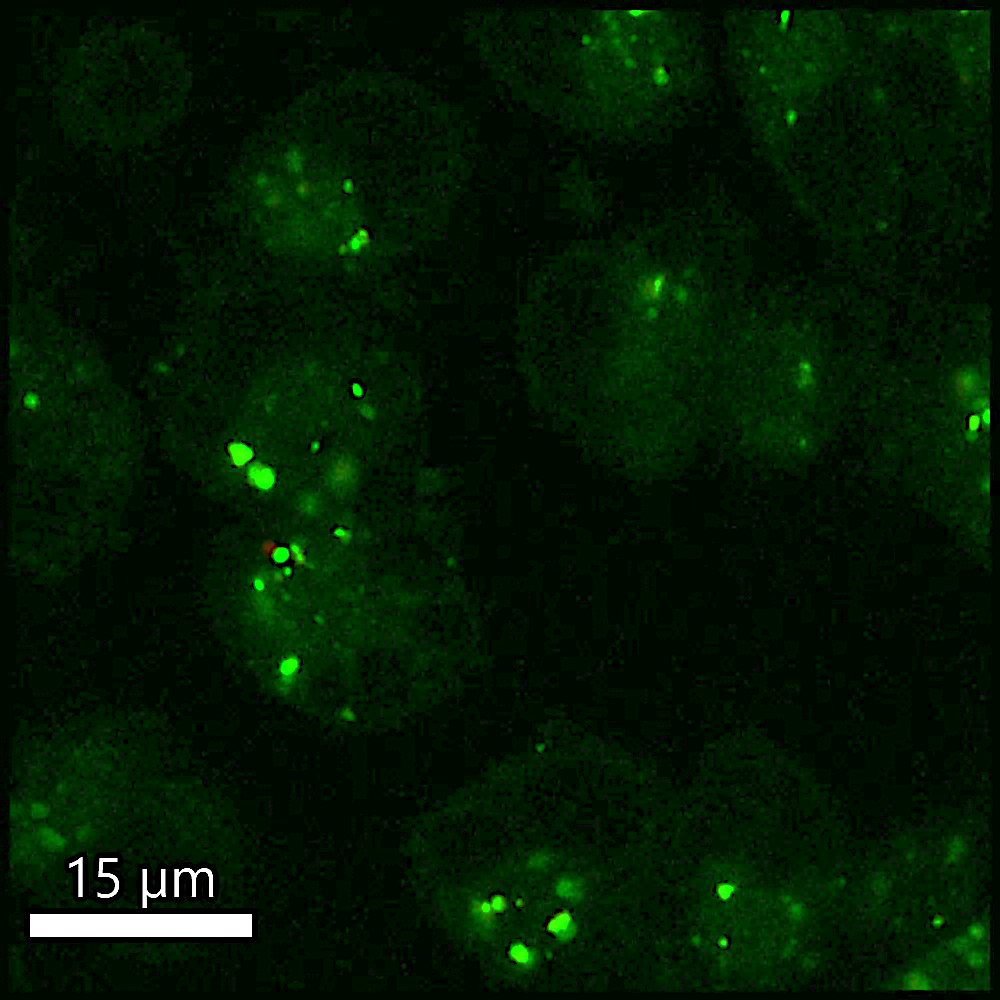

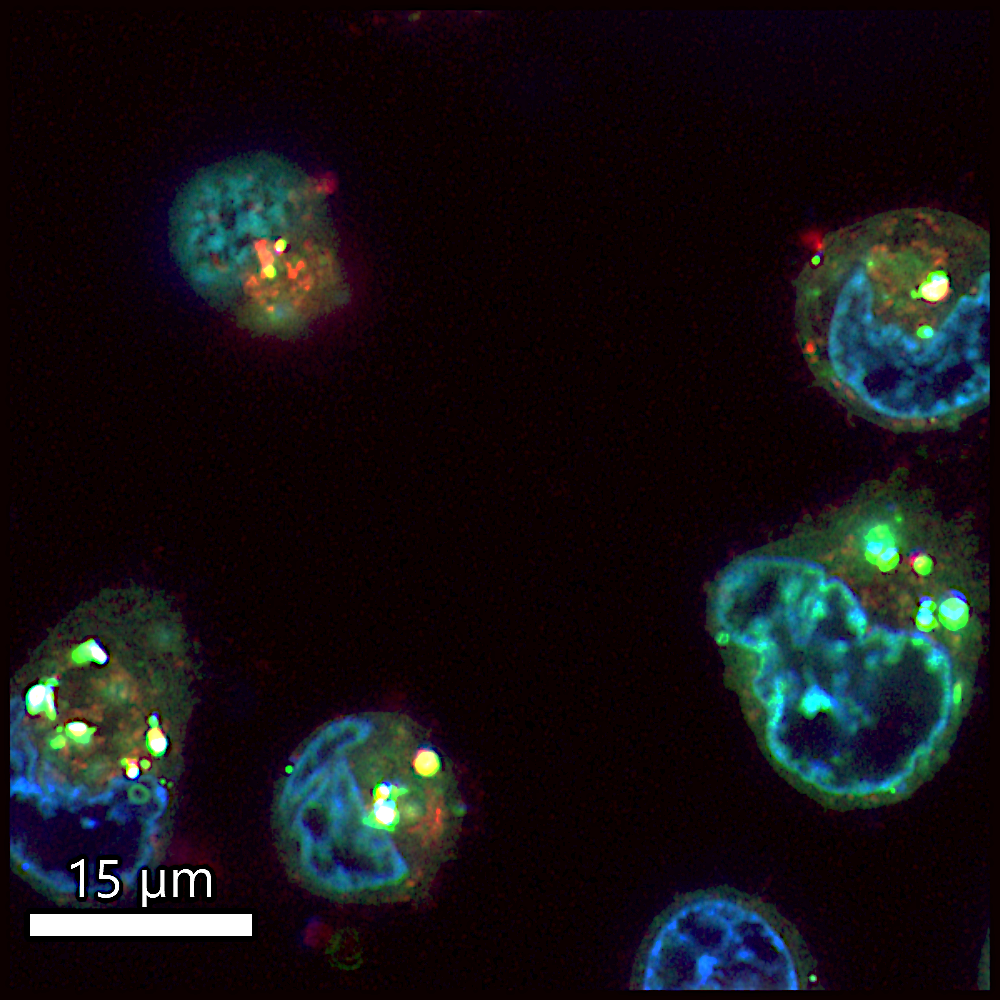

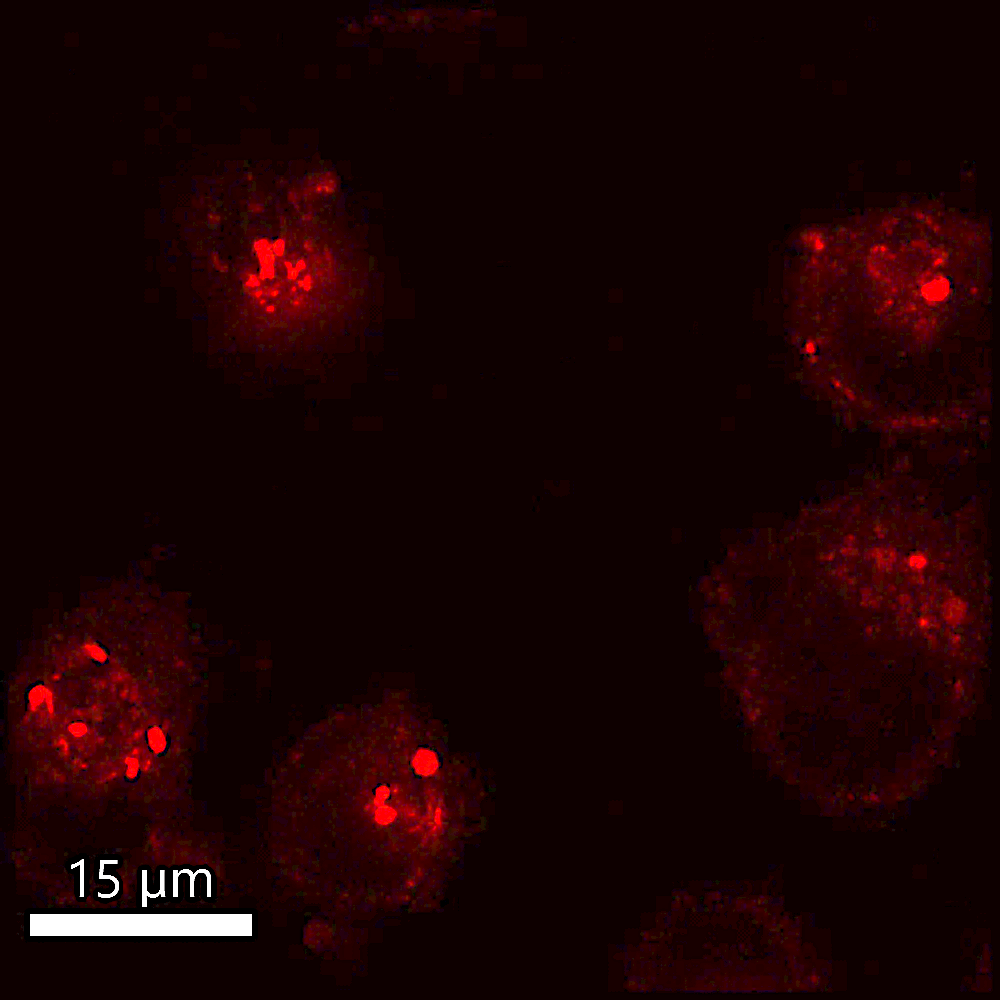

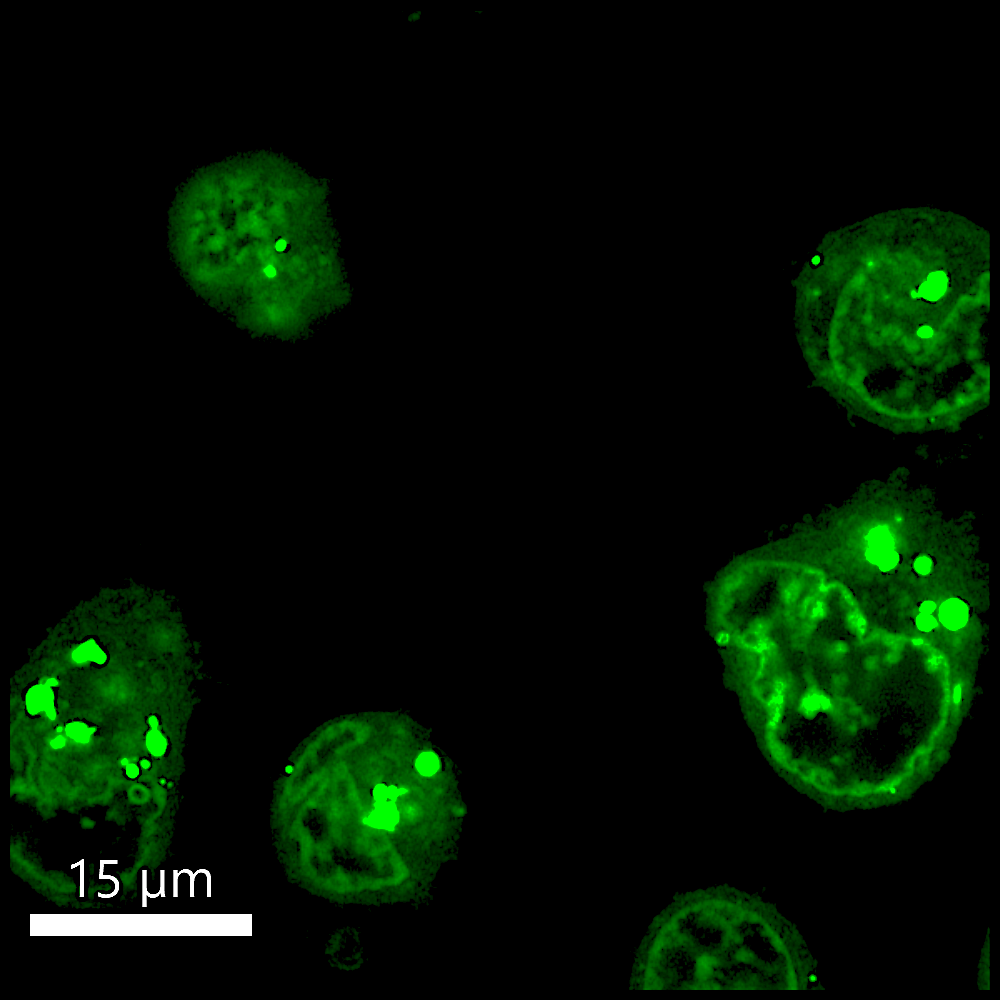

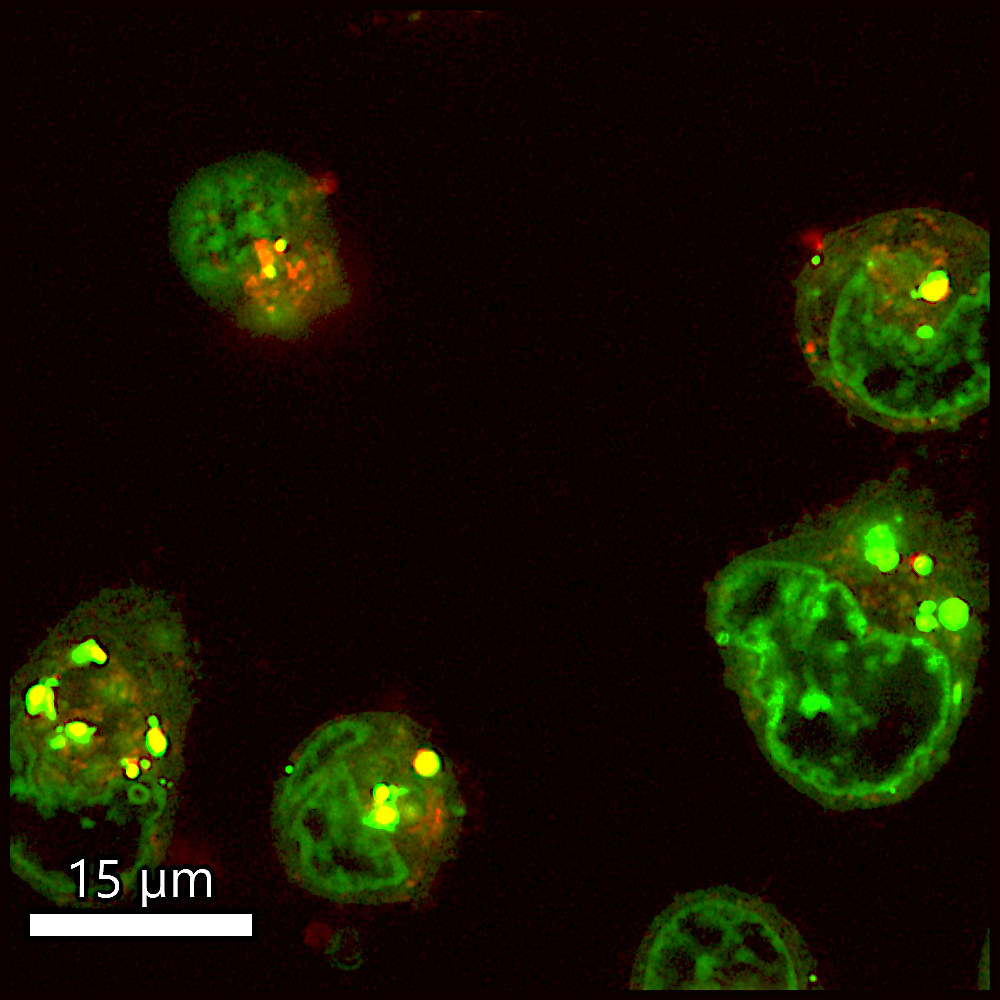


**DOX**

**a**

**b**

**c**

**Control**

C’ dot

Dox

Merge

C’ dot

Dox

Merge

C’ dot

Dox

Merge


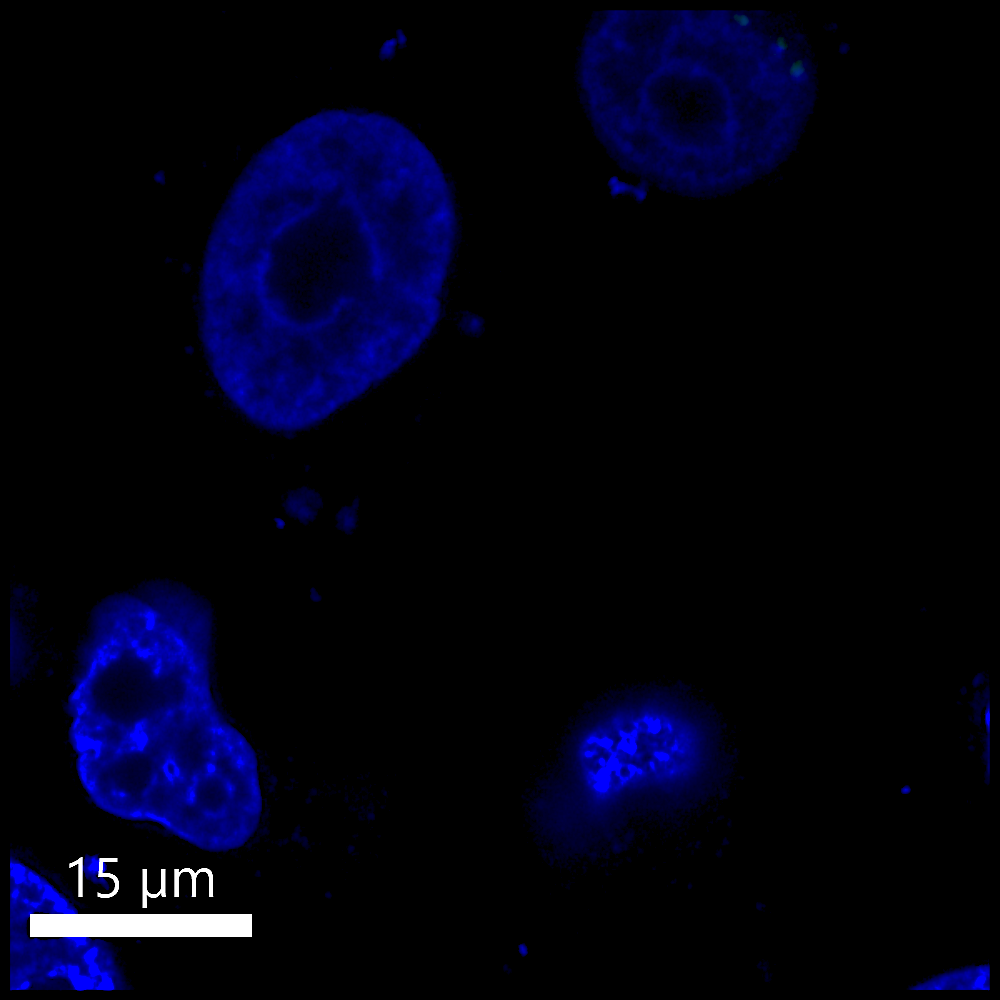

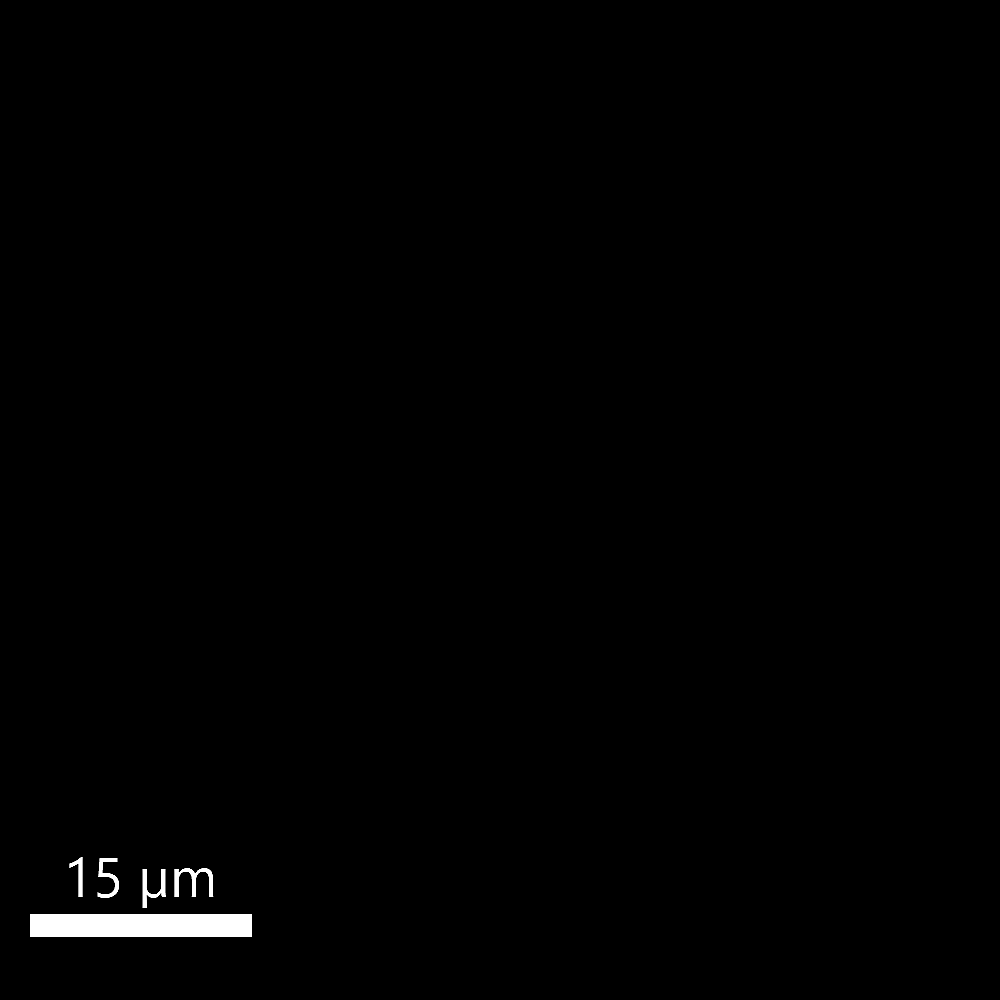

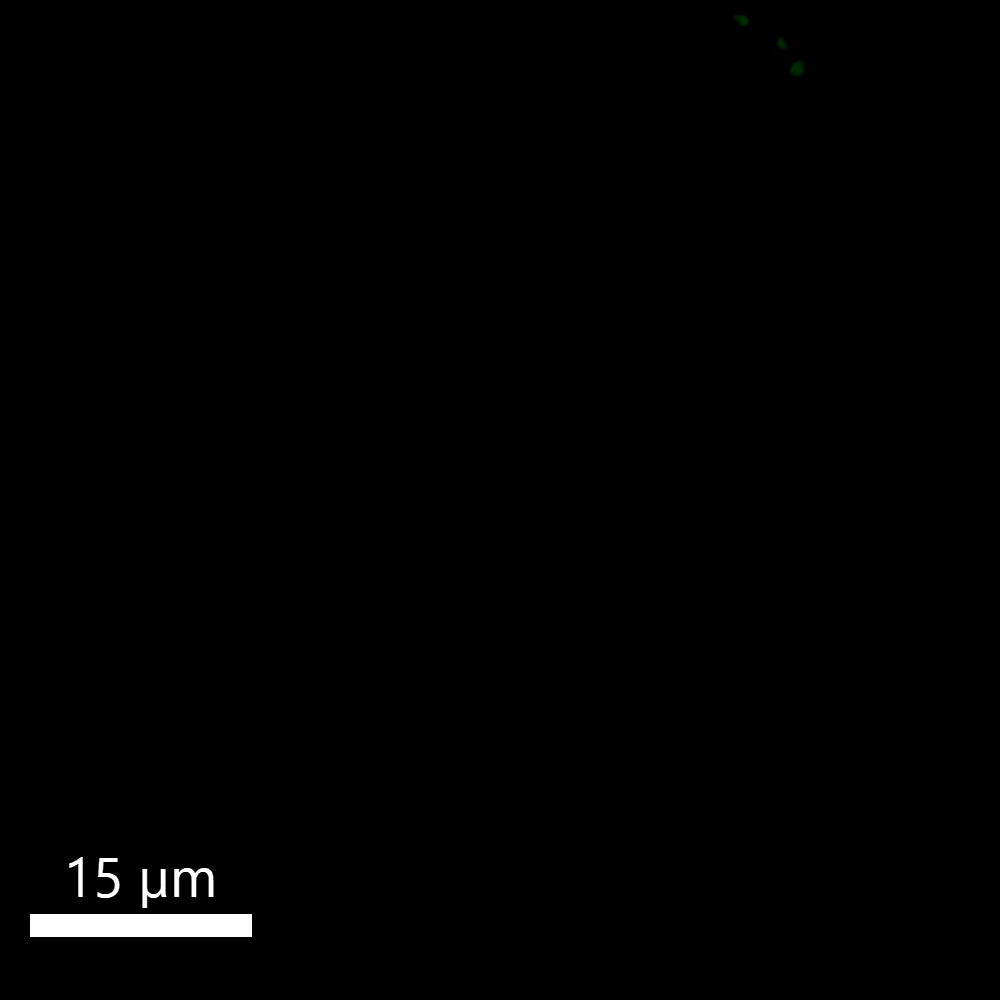

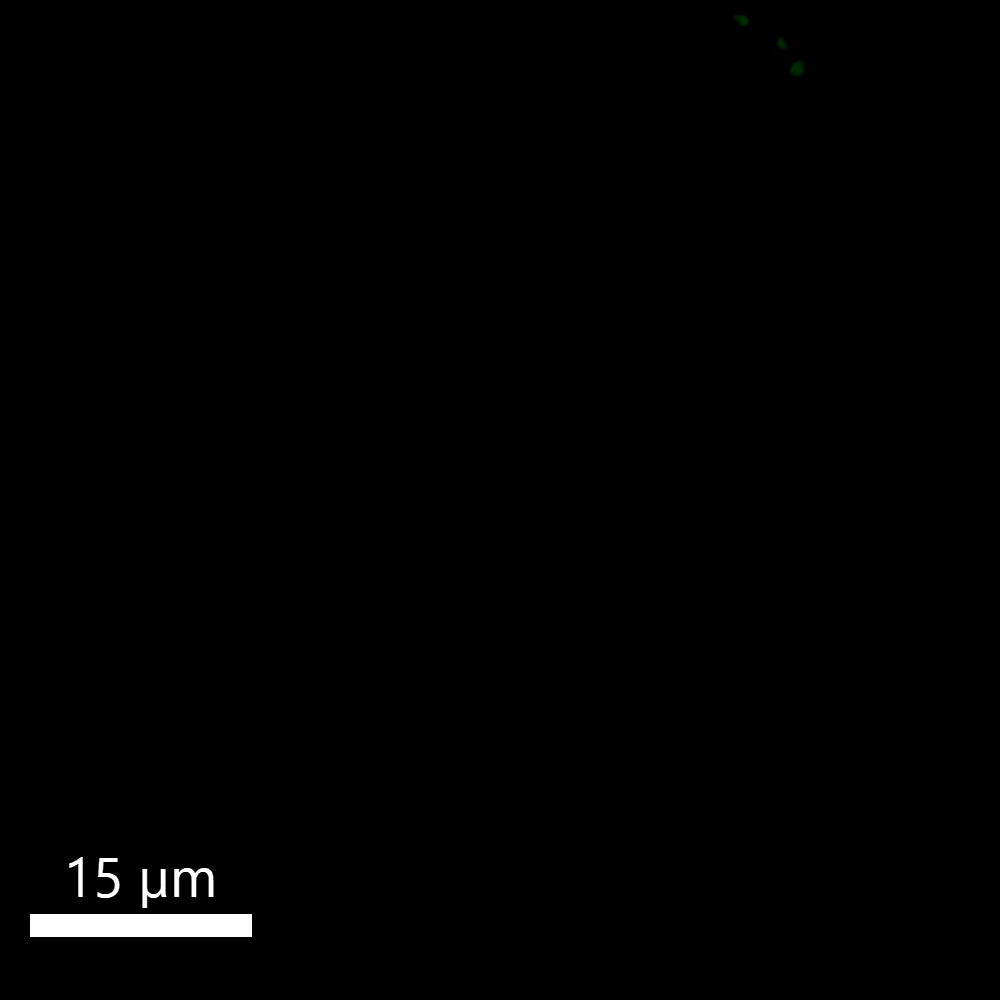

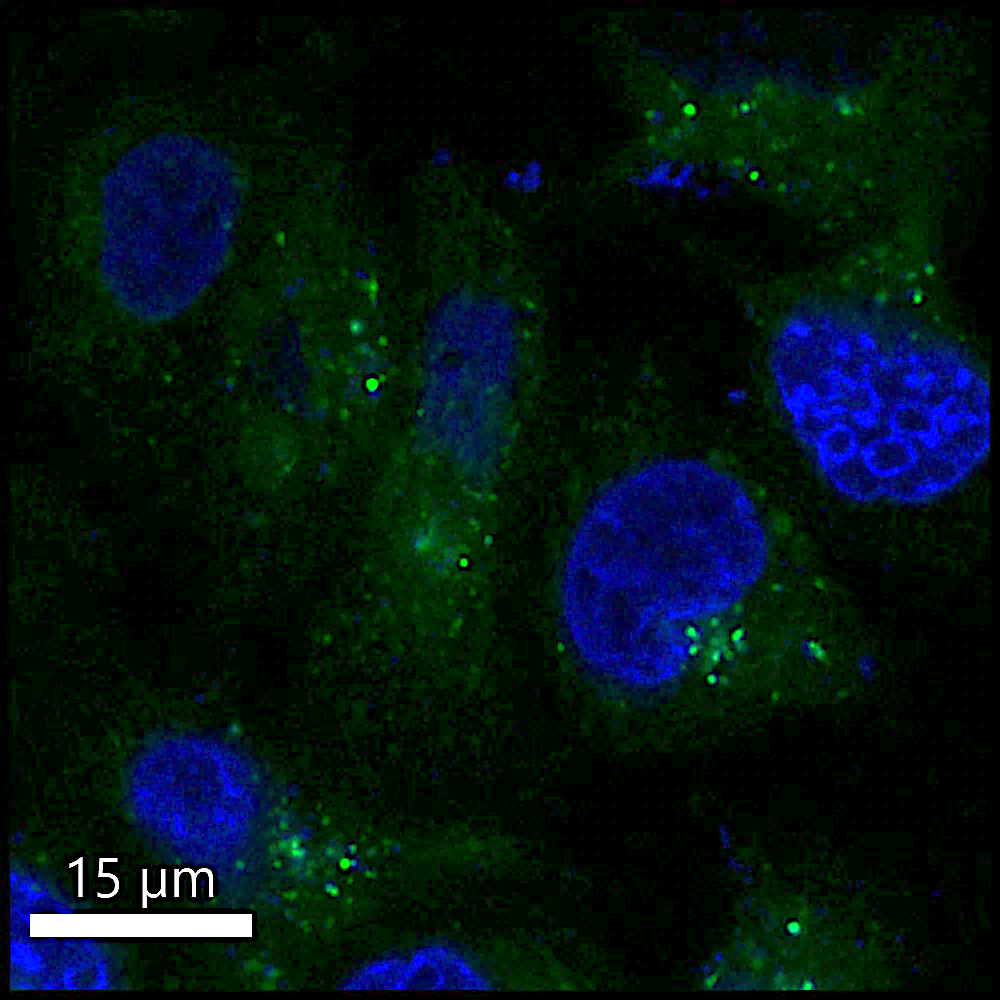

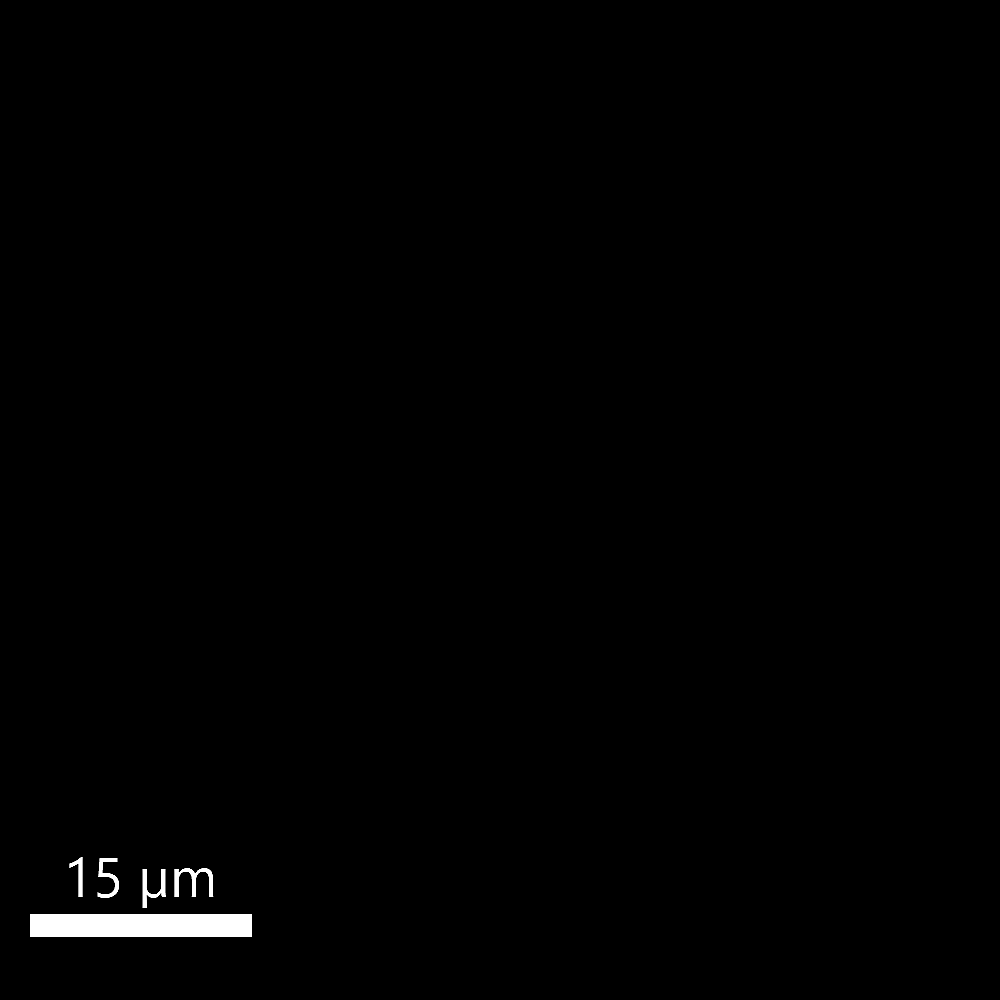

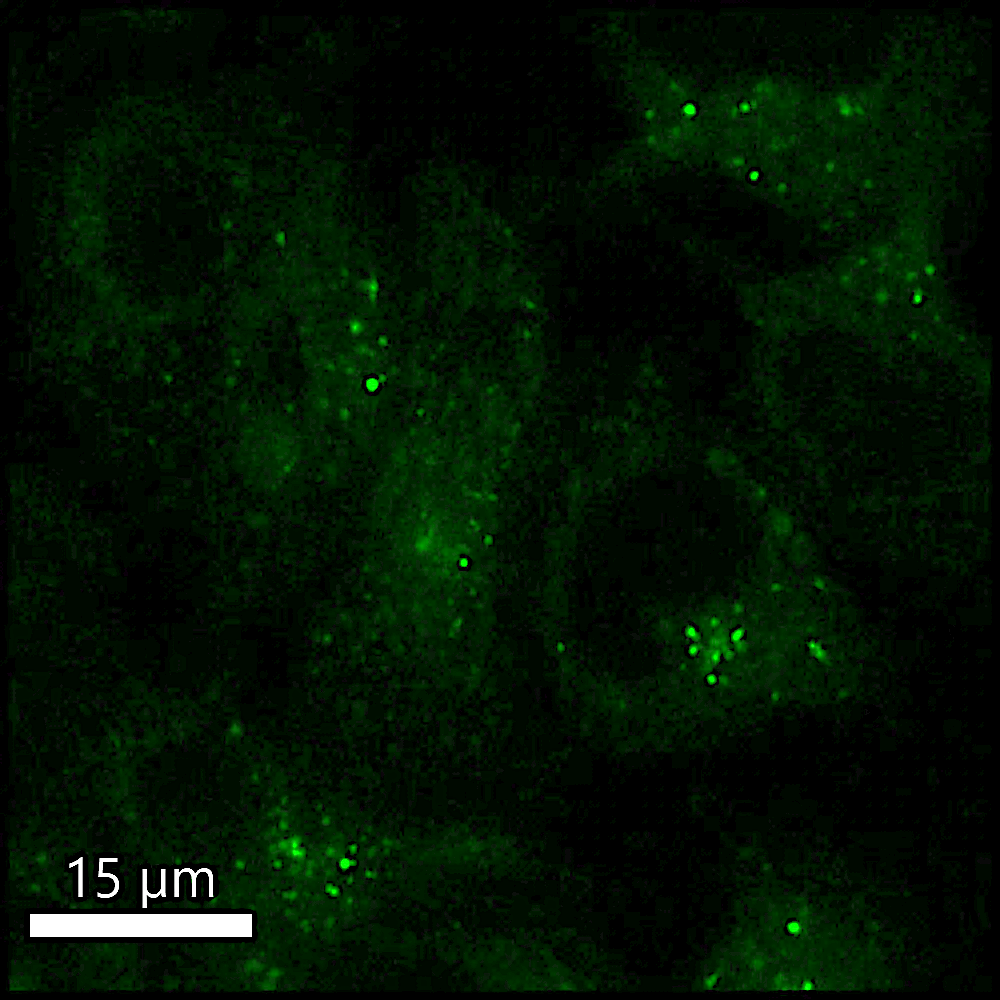

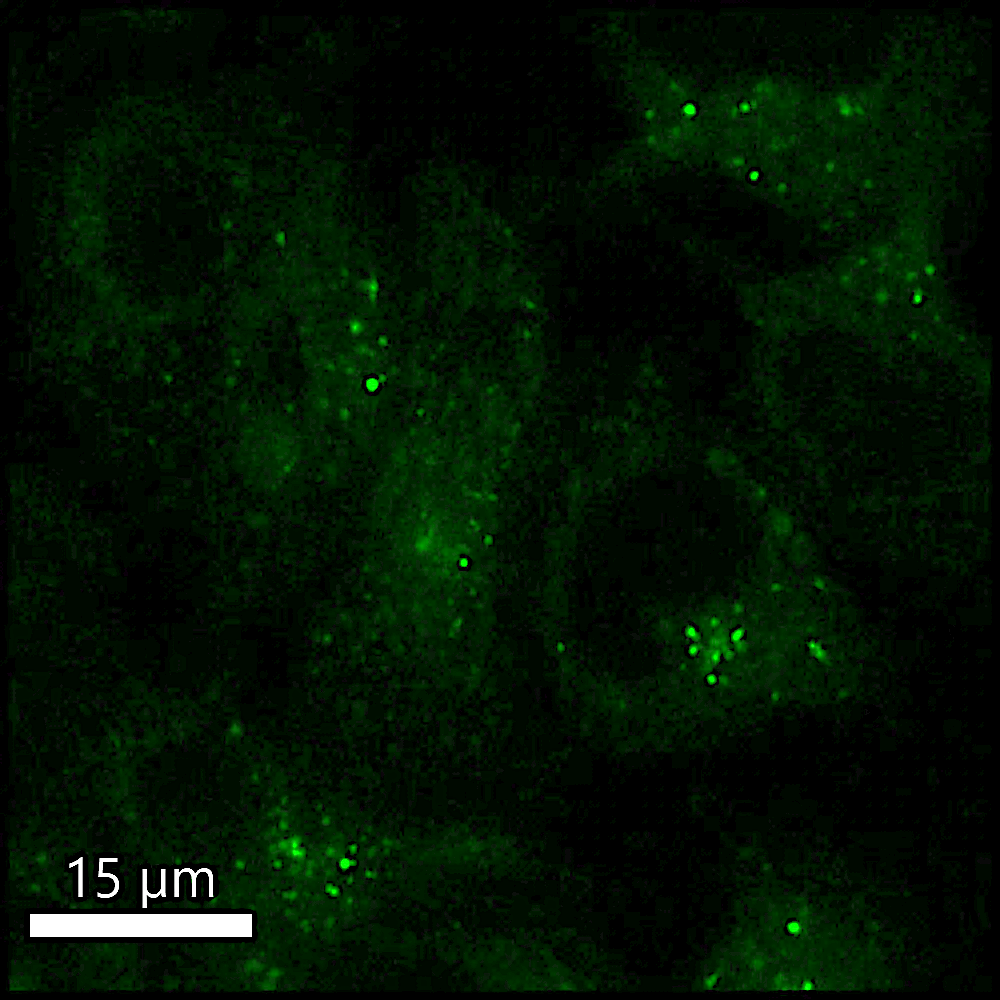

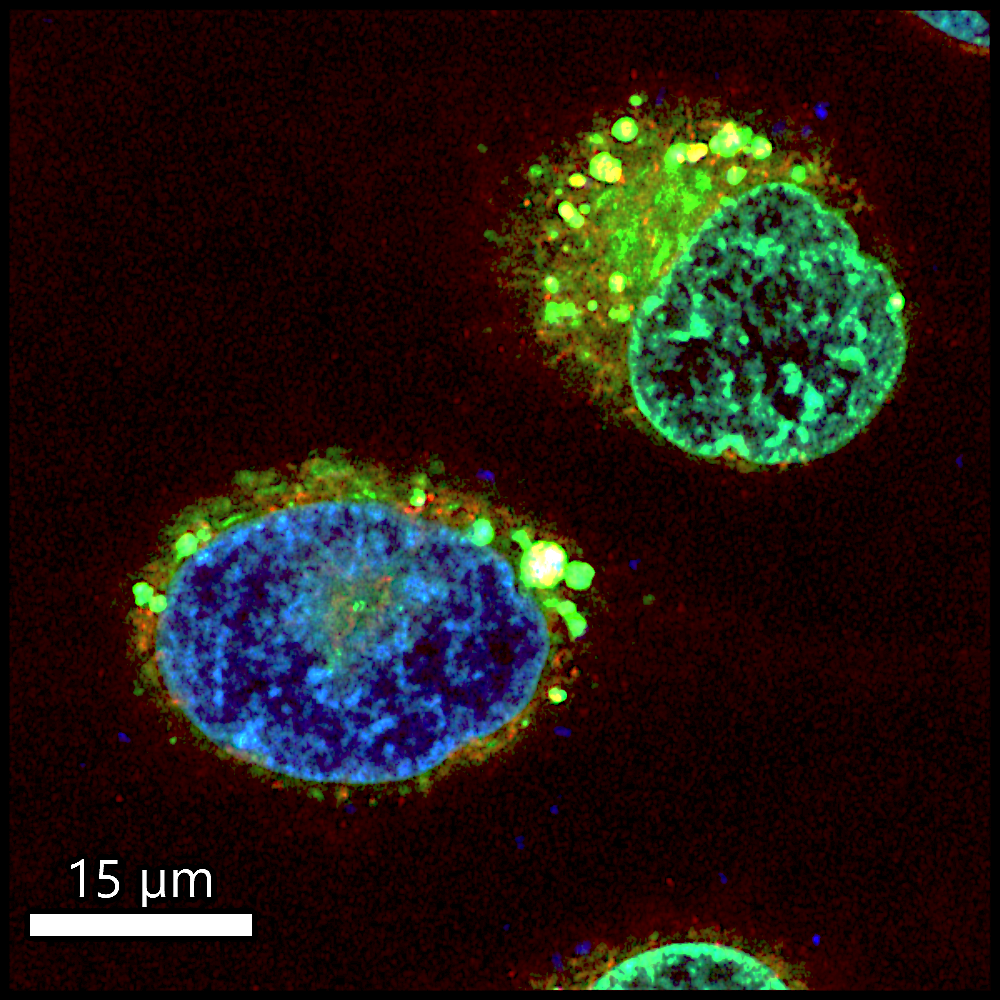

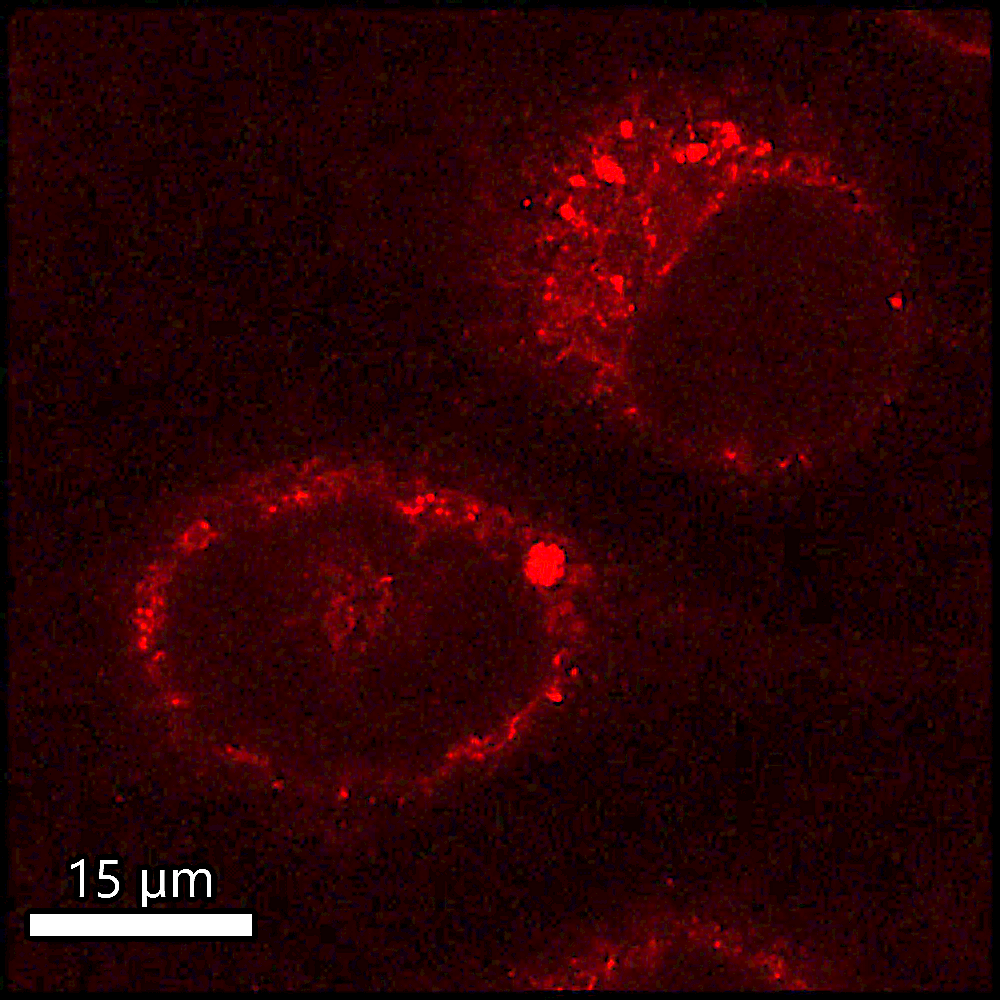

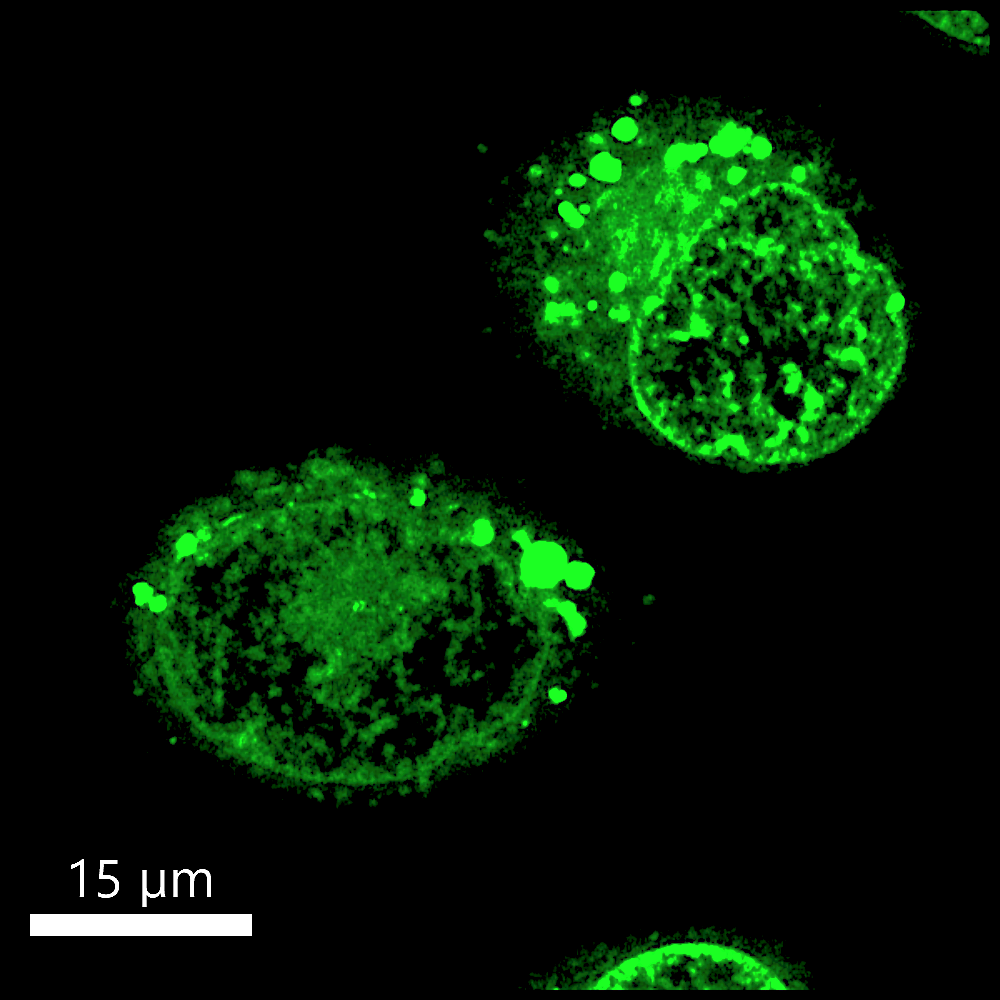

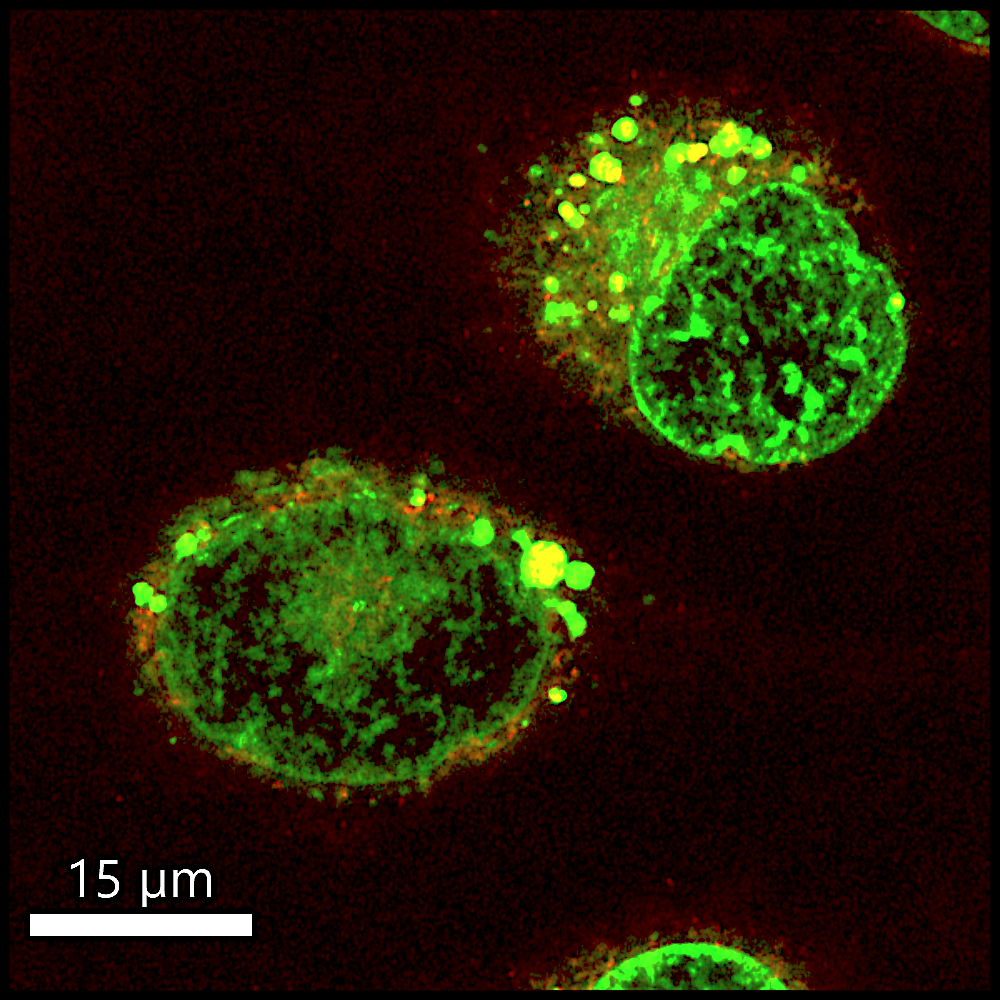


**DOX-C’ dots**

**DOX**

**d**

**e**

**f**


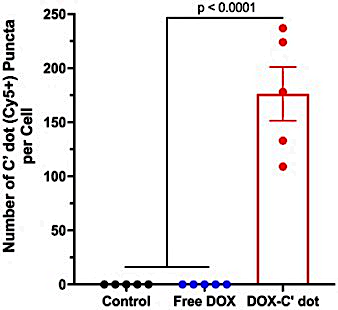


MDA-MB-231


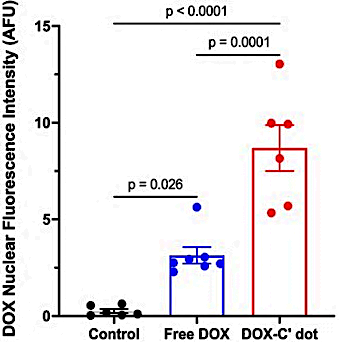

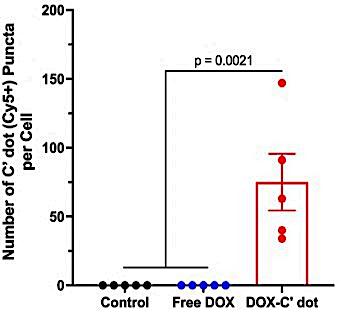


ECLC26

**g**

**h**


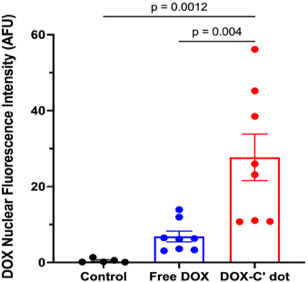


**j**

**i**

ECLC26

**E**

**DA**

**F**

**f**

**e**

**d**

**Fig. S7. Intracellular pH-responsive release of DOX from DOX-C’ dots in ECLC26 and MDA-MB-231 cells.** DOX-C’ dots demonstrate enhanced DOX accumulation over the native drug alone in both human **(a-c)** breast (MDA-MB-231) and **(d-f)** lung (ECLC26) carcinoma cells. Both cell types were treated with DOX-C’ dots **(c,f)** or DOX **(b,e)** alone (500 nM, 24 hours) or left untreated (**a,d**; control). Cells were counterstained with Hoechst prior to analysis. Live cell images of DOX (green), DOX-C’ dot (red) and Hoechst (blue) were acquired using confocal microscopy. Scale bars, 15 mm. The pH range of endosome and lysosome has been reported to be 6.5 to 4.5 (1). Free DOX is known to be accumulated in cell nucleus, while ~7 nm sized DOX-C’ dot can only traffic to endosomes and lysosomes in the cytoplasm (red arrowhead). The observation of DOX signal inside the nucleus after 24 hours (white arrowhead) clearly indicated the successful cleaving of free DOX from the DOX-C’ dot in endosomal (and/or lysosomal) compartments, which then trafficked to the cell nucleus. **(g-j)** Quantification of intranuclear DOX signal and C’ dot (Cy5+) puncta per cell in lung (ECLC26) **(g,h)** and breast (MDA-MB-231) **(i,j)** carcinoma cells for each treatment group. Results indicate mean +/- SEM. Statistical analyses were based on a one-way ANOVA followed by a post hoc Tukey’s test.

**Fig. S8. In vivo PET imaging of 89Zr-DFO-DOX-C’ dots with increasing DPRs from zero to ~50 in normal healthy mice.** Coronal-section PET images with color scale of all images normalized to a maximum of 20 %ID/g.

**Fig. S9. DPR-dependent biodistribution of 89Zr-DFO-DOX-C’ dots in normal healthy mice (n=3).** Biodistribution of 89Zr-DFO-DOX-C’ dots in major organs and tissues for a DPR of 0 to ~50, harvested at the termination of the study (Day 7), and expressed in terms of %ID/g.

**Fig. S10. Clearance and biodistribution of 89Zr-DFO-DOX-C’ dots in normal healthy mice (n=3) at an optimal DPR value.** (**a**) Cumulative clearance measurements of 89Zr-DFO-Dox-C’ dots with a DPR of 30 in urine and feces (%ID) at various post-injection time points over a 7-day period (n = 3; error bars: mean + SD). (**b**) Biodistribution of 89Zr-DFO-DOX-C’ dots with a DPR of 30 in major organs and tissues on Day 7, expressed in terms of %ID (n = 3; error bars: mean + SD).


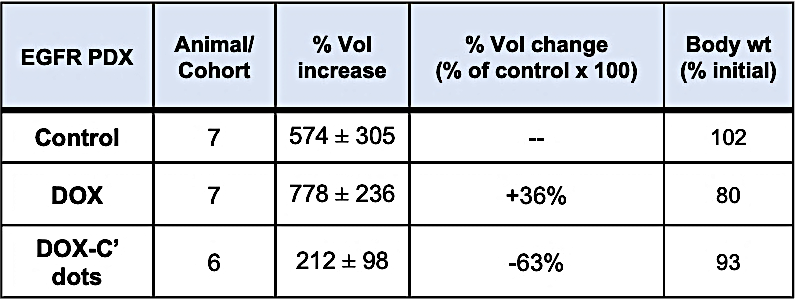

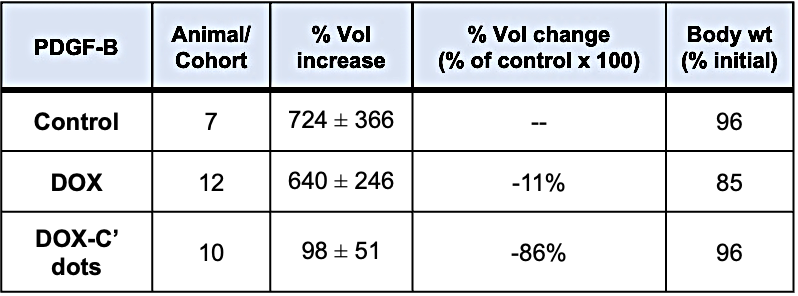


**(c)**

**(a)**

**(b)**

**(d)**

**Fig. S11. Tumor volume and body weight changes for saline vehicle (control), DOX, and DOX-C’ dot treated glioma mice. (a,b)** Percent tumor volume (% vol) increases, % volume changes (% of controls), and percent change in body weights from initial values were measured and tabulated for both **(a)** EGFR PDX and **(c)** PDGF-B glioma mice treated with vehicle, DOX, and DOX-C’ dots. Data presented as mean + s.e.m. **(b,d)**. Corresponding time-dependent changes in body weight (% initial) for **(b)** EGFR PDX and **(d)** PDGF-B glioma mice as a percentage of their initial weights for therapeutically equivalent amounts of DOX.

**
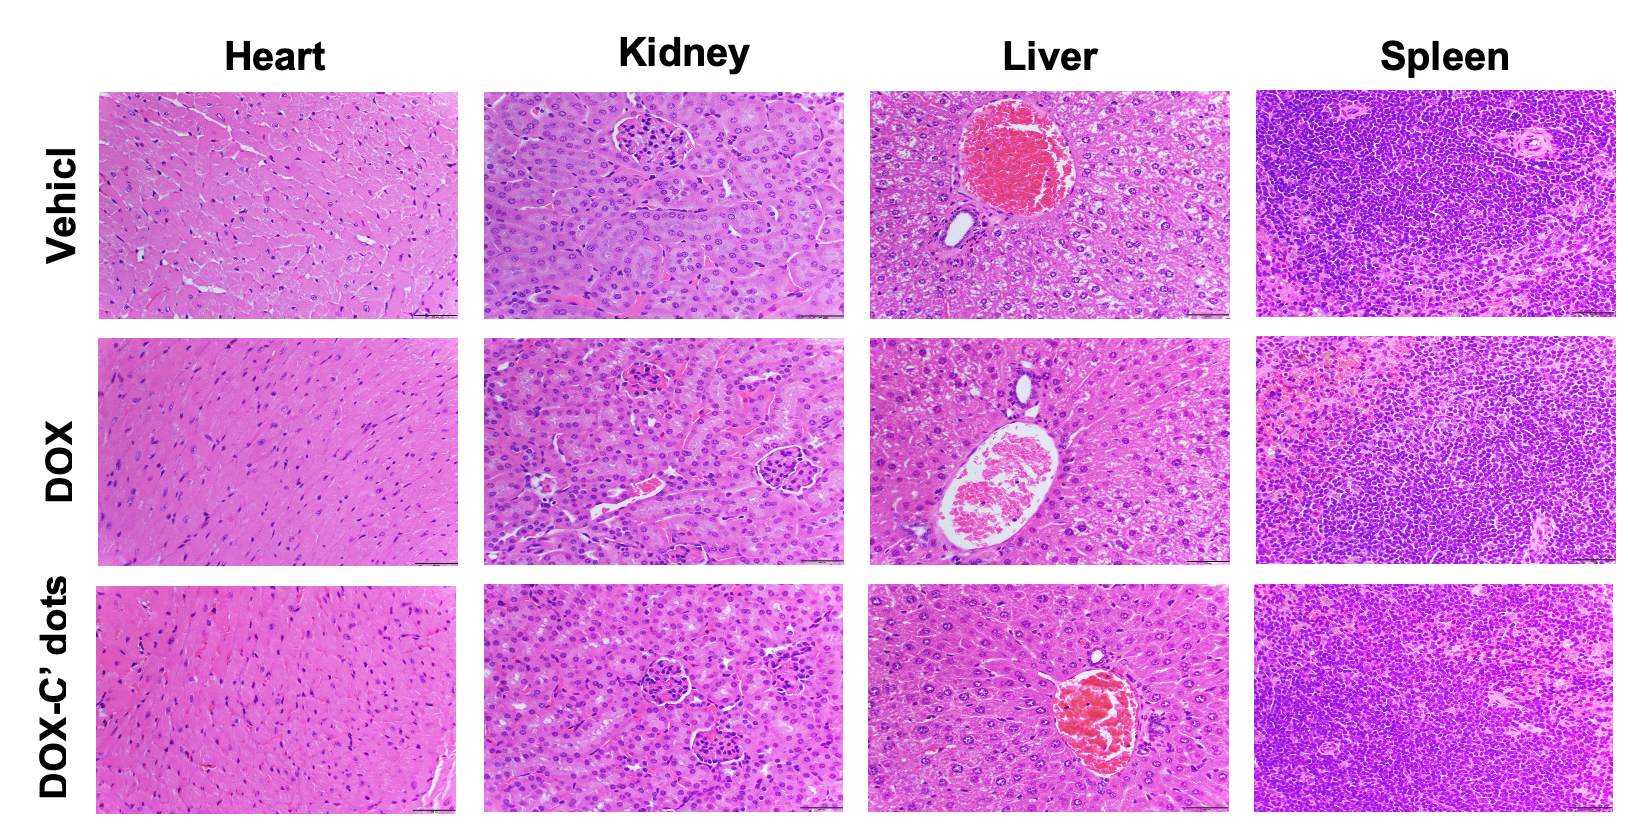
**

**Fig. S12. H&E staining of tissues treated with saline vehicle, DOX, or DOX-C’ dots.** DOX-C’ dots demonstrated no dose-limiting toxicity. Heart, kidney, liver, and spleen samples were also collected following the saline control and DOX treatment groups. Tissue sections from each mouse (n = 3 mice/ treatment) were histologically assessed by an independent pathologist using H&E staining. Scale bar = 50 m.

**
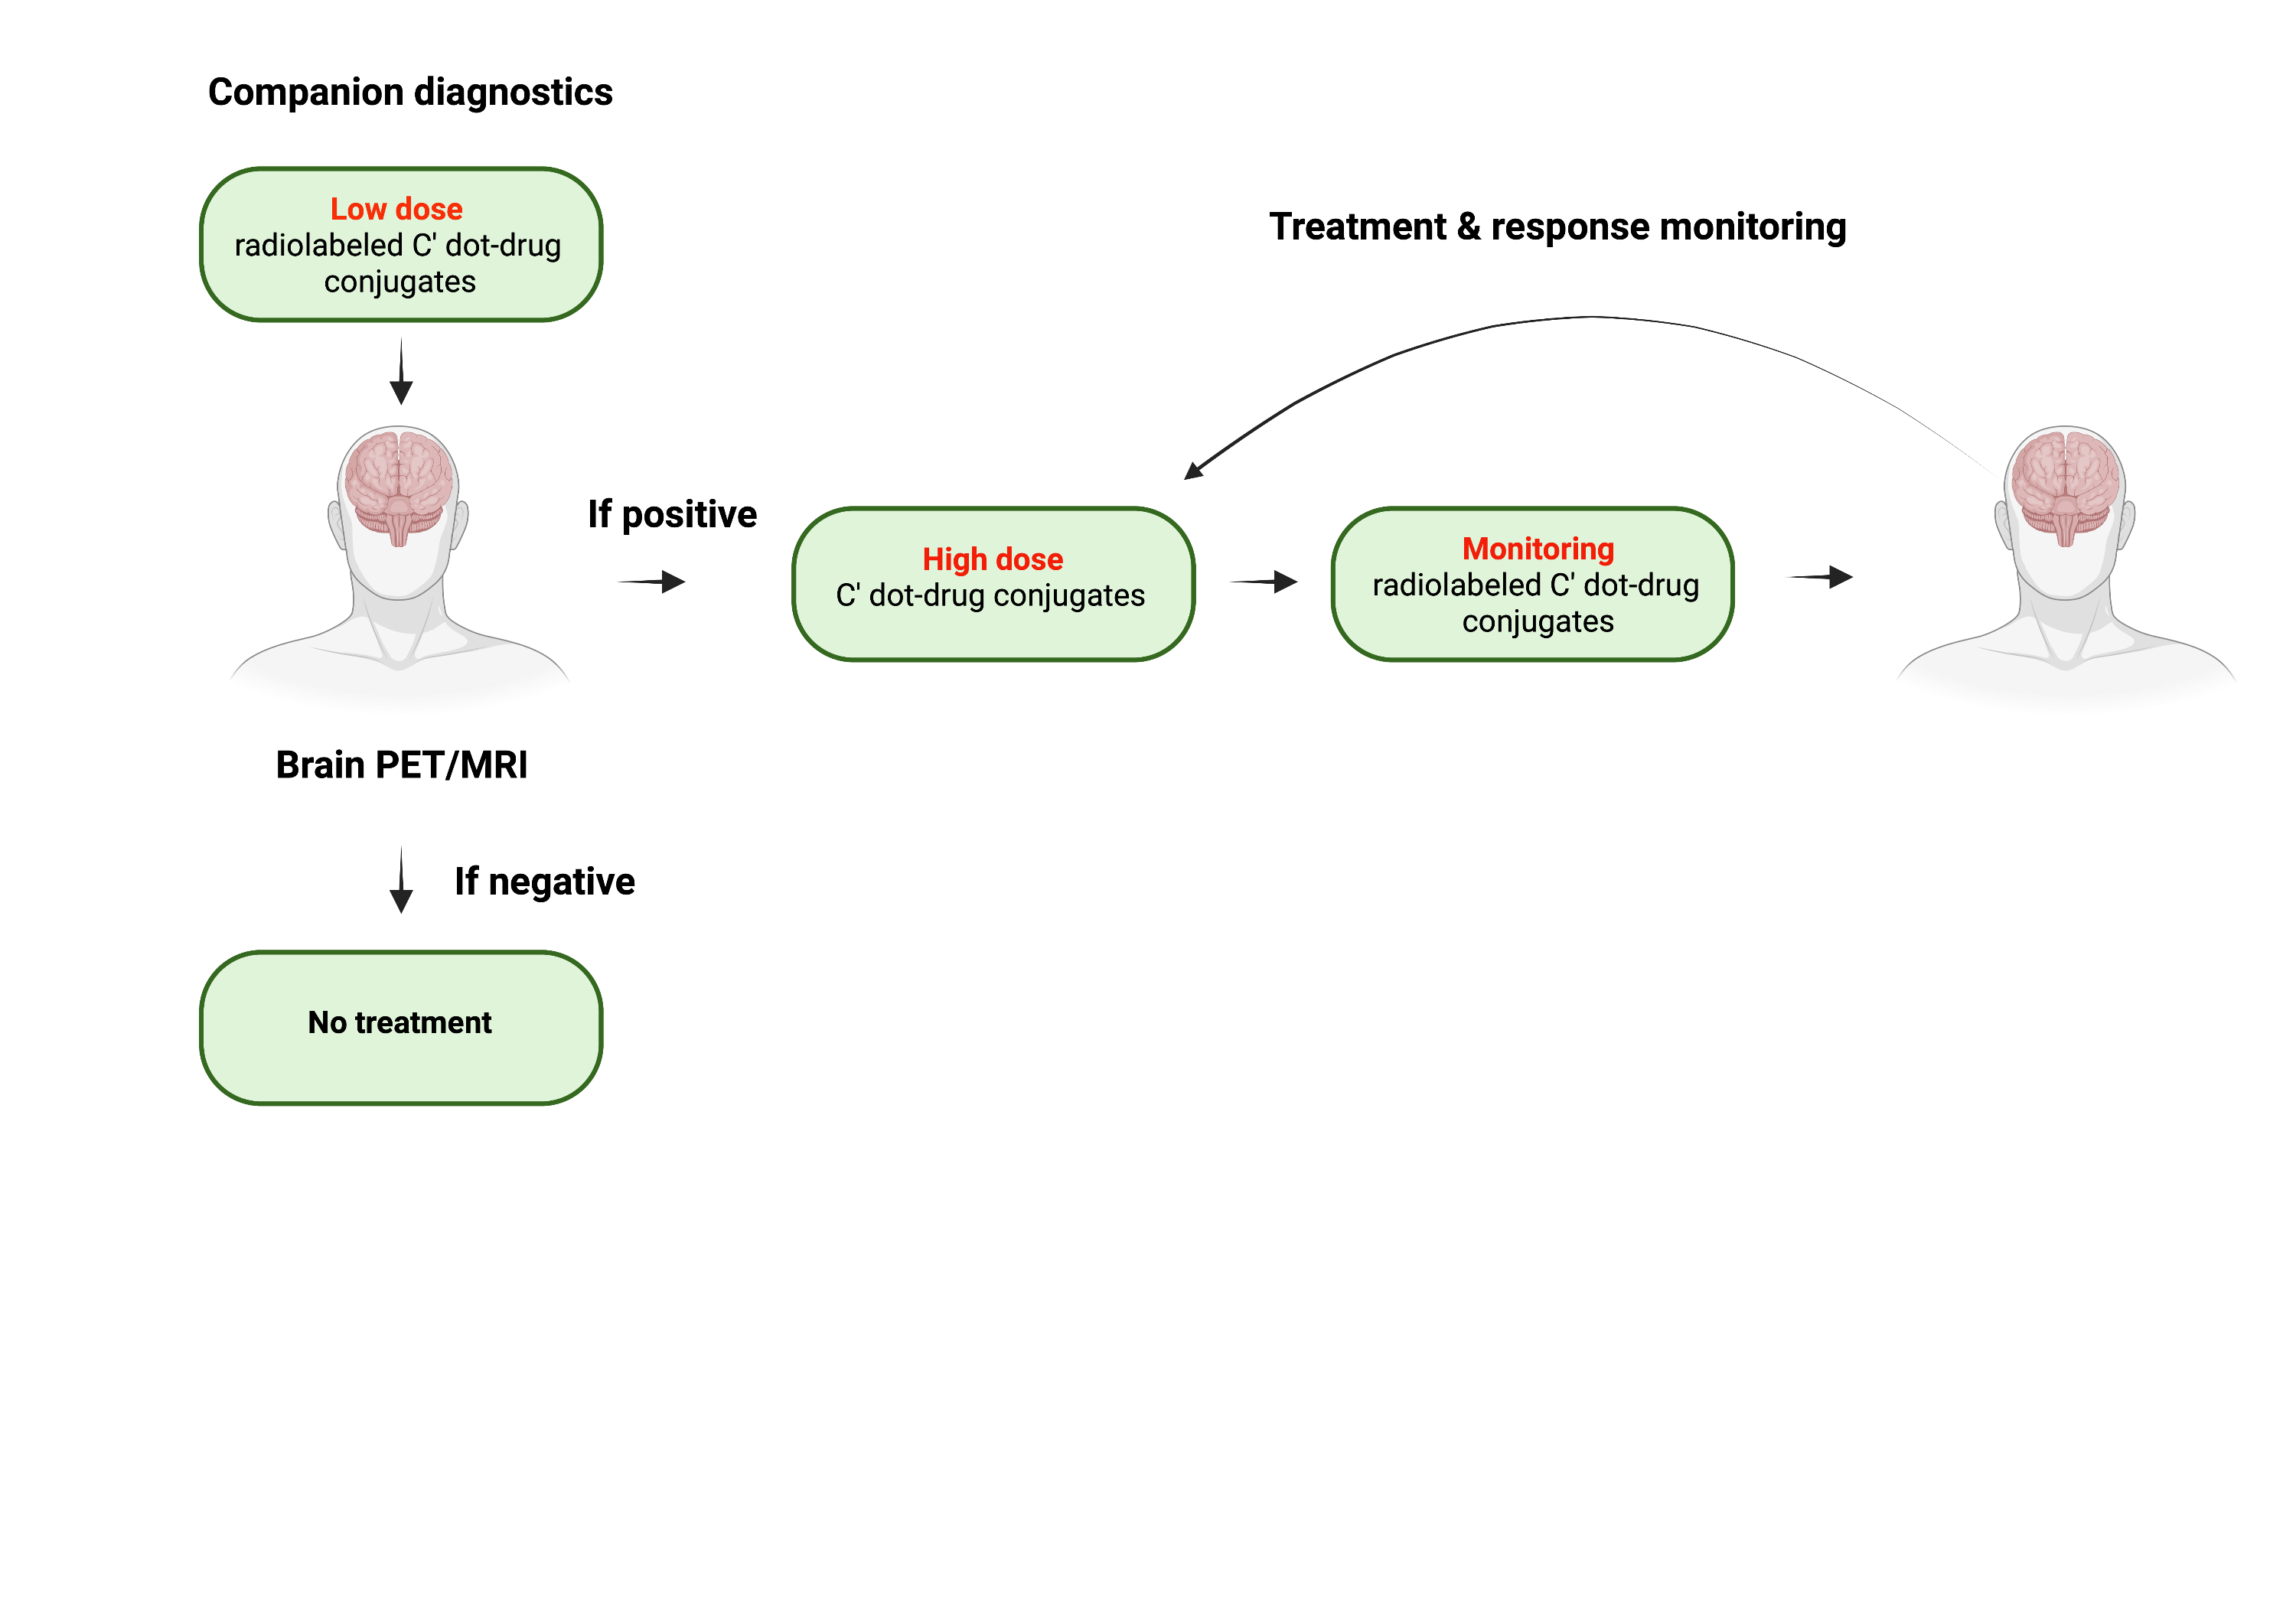
**

**Fig. S13. Envisioned future malignant brain tumor patient management workflow using the dual-modality ultrasmall C’ dot technology.** Low-dose radiolabeled C’ dot-drug conjugate tracers will be used as a companion diagnostic tool to identify patients who may be eligible to receive particle-based therapies and for treatment response monitoring. Higher-dose C’ dot-drug conjugate preparations will be used for therapeutic studies. This schematic was created using BioRender.com.

**SUPPLEMENTARY TABLES**

**Table S1. Representative clinical trials in high-grade gliomas, brain metastases, and other solid tumors treated with nanoformulated or free doxorubicin and other selected therapies**

| **Identifier** | **Title** | **Phase/**  **Status** | **Rationale/Goals** | **Location** |
| --- | --- | --- | --- | --- |
| NCT00795678 | Clinical Study to Assess Entry of Chemotherapeutic Agents into Brain Metastases in Women with Breast Cancer | P1  (C) | Assess target tissue penetration, inform future rational drug designs and regimens | MSK, Cleveland Clinic |
| NCT01702129 | Clinical Study of DOX Loaded Anti-EGFR Immunoliposomes in Patients with Advanced Solid Tumors | P1  (C) | Antibody-coated immunoliposomes attach selectively  to antigens expressed on target cells and are internalized efficiently. | University Hospital, Basel, Switzerland |
| NCT00011414 | Pharmacokinetic Study of Tariquidar (a P-Glycoprotein Inhibitor) in Combination with DOX, Vinorelbine or Docetaxel in Pediatric Patients with Refractory Solid Tumors, Including Brain Tumors | P1  (C) | Evaluate tolerance and effects of tariquidar, combined with other anticancer drugs (DOX, vinorelbine, docetaxel) for treating solid tumors. | NIH  Clinical Center |
| NCT00019630 | Study of DOX HCl Liposome in Pediatric Patients with Refractory Solid Tumors | P1  (C) | Determine tolerance, toxicity of DOX HCl liposome, MTD, PK, and whether serum troponin T is a useful biomarker of DOX-induced myocardial damage. | Children’s  Hospital of Philadelphia,  Pediatric Oncology |
| NCT01386580 | An Open-label, Dose Escalating Study of 2B3-101 in Patients with Solid Tumors and Brain Metastases or Recurrent Malignant Glioma | P1/2a  (C) | Determine safety, tolerability and PK of glutathione PEG- liposomal DOX as a single agent or combined with trastuzumab.  Assess antitumor activity as a single agent in brain metastases or recurrent malignant glioma or combined with trastuzumab in HER2+ breast cancer with brain metastases. | United States, Belgium, France, Netherlands  (multiple locations) |
| NCT00002608 | Cisplatin, DOX, and Tamoxifen in the Treatment of Incurable Soft Tissue and Endocrine Malignancies | P2  (C) | Assess effectiveness of cisplatin and DOX together with tamoxifen in solid tumors | Ottawa Regional Cancer Ctr, Ottawa Hosp, Canada, Ontario |
| NCT02766699 | Study to Evaluate the Safety, Tolerability, and Immunogenicity of EGFR (Vectibix® Sequence)-Targeted EnGeneIC Dream Vectors Containing DOX (EGFR(V)-EDV-DOX) in Subjects with Recurrent GBM | P1  (R) | Assess safety, tolerability, dosing of EGFR(V)-EDV-DOX; immune responses, effectiveness in recurrent GBM. (n.b. EGFR(V)-EDV-DOX uses EnGeneIC EDV, bacterial-derived minicells packaging DOX in 400 nm particles adapted with bispecific antibodies) | John Hopkins Hospital; Lenox Hill Hospital |
| NCT02343991 | A Study to Evaluate the Safety and Feasibility of Blood-Brain Barrier Disruption Using Transcranial MRI-Guided Focused Ultrasound with Intravenous Ultrasound Contrast Agents in the Treatment of Brain Tumors with DOX | P1, active, (NR) | Assess safety, BBB disruption using transcranial MRI-guided focused U/S and an IV U/S contrast agent to increase uptake of DOX in brain tumors and adjacent brain. Data will inform efficacy studies. | Sunnybrook Health Sciences Ctr  Canada, Ontario |
| NCT02372409 | A Pilot Study Using MRI-Guided Laser Heat Ablation to Induce Disruption of the Peritumoral Blood-Brain Barrier to Enhance Delivery and Efficacy of Treatment of Pediatric Brain Tumors | P1  (R) | Correlate advanced MRI with serum biomarkers of BBB disruption to identify the window of maximal BBB disruption post MRI-guided laser ablation to allow for alternatives to surgery in incompletely resected tumors, improving benefits and risks using optimal chemotherapy doses and distinguishing tumor progression from long-term effects of laser treatment. | Washington University School of Medicine |
| NCT02735798 | A Pilot Study of 64Cu-labeled Brain PET/MRI for MM-302, a Novel HER2-Targeting Agent in Advanced HER2+ Cancer with Brain Metastases | P1  (W, not funded) | Assess new and progressive HER2+ cancers with brain metastases using PET-MRI imaging, 64Cu-MM-302 (HER2-targeted antibody–liposomal DOX conjugate) and unlabeled MM-302 combined with trastuzumab | No Contacts or Locations Provided |
| NCT00465673 | Study of Liposomal Doxorubicin (Lipo-Dox) in Patients with Brain Metastasis from Breast Cancer | P2  (T, low recruit) | Assess treatment response rate of Lipo-Dox in breast cancer patients with brain metastasis | Johns Hopkins Singapore International Medical Center, Singapore |

***Legend:*** *C, completed; R, recruiting; NR, not recruiting; W, withdrawn; T, terminated; DOX, doxorubicin; ma; BCBM, breast cancer brain metastases; GBM, glioblastoma multiforme; PK, pharmacokinetics; MTD, maximum tolerated dose; BBB, blood-brain barrier; U/S, Ultrasound*

**Table S2. The cumulative clearance of 89Zr-DFO-DOX-C’ dots in mouse urine and feces at different post-injection time points (n=3). Note, the radioactivity in both urine and feces was measured using a CRC®-55tR Dose Calibrator and presented as %ID (mean ± SD).**

|  | **Urine (%ID)** | | **Feces (%ID)** | |
| --- | --- | --- | --- | --- |
|  | Ave. | SD | Ave. | SD |
| *6 h* | 13.9 | 1.2 | 1.0 | 1.5 |
| *24 h* | 28.4 | 0.7 | 8.8 | 1.3 |
| *48 h* | 38.3 | 1.2 | 19.0 | 6.3 |
| *72 h* | 41.1 | 2.7 | 20.5 | 7.6 |
| *120 h* | 44.7 | 2.5 | 21.7 | 7.9 |
| *168 h* | 47.3 | 2.7 | 22.2 | 8.2 |

**Table S3. *Ex vivo* biodistribution data of 89Zr-DFO-DOX-C’ dots at 168 h (on Day 7) post-injection (n=3, from a metabolic cage study). Radioactivity in major organs and tissues was measured using a gamma-counter and presented as %ID (mean ± SD).**

| **Organ (%ID)** | **Ave.** | **SD** |
| --- | --- | --- |
| Blood | 0.2 | 0.1 |
| Heart | 0.4 | 0.1 |
| Lungs | 0.3 | 0.1 |
| Liver | 3.7 | 0.8 |
| Spleen | 0.2 | 0.1 |
| Stomach | 0.1 | 0.1 |
| Sm. Int. | 1.1 | 0.4 |
| Lg. Int. | 0.5 | 0.1 |
| Kidneys | 0.5 | 0.1 |
| Brain | 0.01 | 0.00 |
| Carcass | 30.1 | 0.7 |
| Feces | 22.2 | 8.2 |
| Urine | 47.3 | 2.7 |

**Table S4. Radiation dosimetry of 89Zr-DFO-DOX-C’ dots (DPR=30) in a 70-kg standard man estimated by using the OLINDA dosimetry program.**


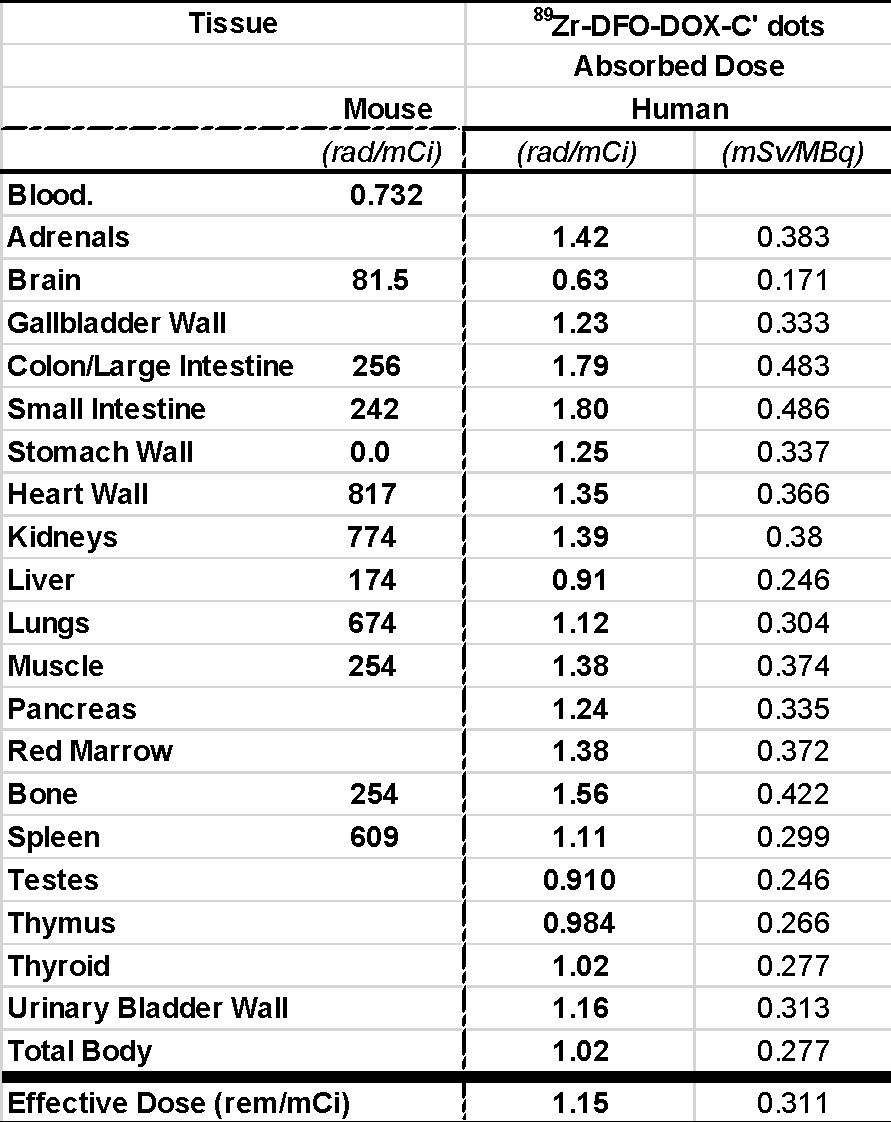


n.b. Mouse absorbed doses were calculated assuming complete local

absorption of the particulate radiations only.

**Table S5. *Ex vivo* biodistribution data of 89Zr-DFO-DOX-C’ dots at 48- and 72-h post-injection (n=3 mice/time point) in PDGF-B glioma mice. Radioactivity in major organs and tissues were measured using a gamma counter and presented as %ID/g (mean ± SD).**

| ***%ID/g*** | **48 h** | | **72 h** | |
| --- | --- | --- | --- | --- |
| ***Ave.*** | ***SD*** | ***Ave.*** | ***SD*** |
| **Blood** | 3.9 | 0.2 | 2.8 | 0.5 |
| **Tumor** | 3.0 | 0.2 | 3.3 | 0.1 |
| **Heart** | 3.4 | 0.5 | 3.5 | 0.3 |
| **Lungs** | 3.5 | 0.3 | 2.9 | 0.6 |
| **Liver** | 4.2 | 0.3 | 4.2 | 0.1 |
| **Spleen** | 3.3 | 0.2 | 2.6 | 0.4 |
| **Stomach** | 1.7 | 0.3 | 1.3 | 0.3 |
| **Sm. Int.** | 2.3 | 0.4 | 2.1 | 0.9 |
| **Lg. Int.** | 1.2 | 0.1 | 1.4 | 0.1 |
| **Feces** | 0.9 | 0.1 | 0.7 | 0.1 |
| **Kidneys** | 3.3 | 0.2 | 1.6 | 0.3 |
| **Muscle** | 0.6 | 0.2 | 1.3 | 0.2 |
| **Bone** | 1.6 | 0.3 | 1.6 | 0.1 |

**Table S6.** Triple-dose toxicity testing in tumor-bearing mice after systemic administration of saline vehicle (**Control group**, *n*=3), DOX alone (**Treatment group #1**, 7 mg/kg/dose, cumulative dose 21 mg/kg, *n*=3), or Dox-NDC (**Treatment group #2**, 7 mg/kg/dose, cumulative dose 21 mg/kg, *n*=3)

| **Test Name** | ***#1 Saline*** | ***#2 Saline*** | ***#3 Saline*** | ***#4***  ***Saline*** | ***#1***  ***Dox*** | ***#2***  ***Dox*** | ***#3***  ***Dox*** | ***#4***  ***Dox*** | ***#5***  ***Dox*** |
| --- | --- | --- | --- | --- | --- | --- | --- | --- | --- |
| **Gender** | Male | Male | Female | Female | Female | Male | Female | Female | Female |
| **Sacrifice Day** | *7* | *7* | *7* | *7* | *7* | *7* | *7* | *13* | *13* |
|  |  |  |  |  |  |  |  |  |  |
| **Gross Examination** |  |  |  |  |  |  |  |  |  |
| **Body weight (g)** | 21.5 | 19.23 | 20.71 | 21.08 | 17.06 | 16.57 | 17.95 | 13.11 | 14.19 |
| **Heart weight (g)** | 0.120 | 0.128 | 0.128 | 0.144 | 0.104 | 0.130 | 0.109 | 0.083 | 0.095 |
| **Histologic examination** | 9.80 | 8.10 | 5.40 | 8.90 |  |  |  |  |  |
| **Heart TUNEL** | N | N | N | N | N | N | N | N | N |
| **Heart Cleaved caspase-3** | N | N | N | N | N | Left/right atrium: Positive myocardial cells, MF, 2. | Left/right atrium: Positive myocardial cells, MF, 2. | N | N |
|  |  |  |  |  |  |  |  |  |  |

| **Test Name** | ***#6***  ***Dox*** | ***#7***  ***Dox*** | ***#8***  ***Dox*** | ***#9***  ***Dox*** | ***#1***  ***Dox-C’ dots*** | ***#2***  ***Dox-***  ***C’ dots*** | ***#3***  ***Dox-C’ dots*** | ***#4***  ***Dox-C’ dots*** | ***#5***  ***Dox-C’ dots*** |
| --- | --- | --- | --- | --- | --- | --- | --- | --- | --- |
| **Gender** | Male | Male | Female | Female | Female | Male | Female | Female | Female |
| **Sacrifice Day** | *13* | *13* | *20* | *20* | *9* | *9* | *15* | *15* | *15* |
|  |  |  |  |  |  |  |  |  |  |
| **Gross Examination** |  |  |  |  |  |  |  |  |  |
| **Body weight (g)** | 12.88 | 13.90 | 18.03 | 21.33 | 22.46 | 23.12 | 21.60 | 21.20 | 25.07 |
| **Heart weight (g)** | 0.092 | 0.087 | 0.119 | 0.129 | 0.122 | 0.129 | 0.136 | 0.126 | 0.136 |
| **Histologic examination** | 9.80 | 8.10 | 5.40 | 8.90 |  |  |  |  |  |
| **Heart TUNEL** | N | N | N | N | NE | NE | NE | NE | NE |
| **Heart Cleaved caspase-3** | Left ventricular wall: Positive myocardial cells, MF, 2. | Left atrium/ ventricular wall: Positive myocardial cells, MF, 1. | N | Left/right atrium: Positive myocardial cells, MF, 1. | NE | NE | NE | NE | NE |
|  |  |  |  |  |  |  |  |  |  |

***Legend:*** *N: Normal; MF: Multifocal; NE: not evaluated*

**Table S7. Evaluation of Hematological Parameters**

| Red Blood Cell Count (RBC) | Platelet Count (PLT) |
| --- | --- |
| Hemoglobin (HGB) | Platelet distribution width (PDW) |
| Hematocrit (HCT) | Mean Platelet Volume (MPV) |
| Mean Corpuscular Volume (MCV) | White Blood Cell Count (WBC) |
| Mean Corpuscular Hemoglobin (MCH) | Neutrophil Count (NEUT) |
| Mean Corpuscular Hemoglobin Concentration (MCHC) | Lymphocyte Count (LYMPH) |
| Red Blood Cell Distribution Width-standard deviation (RDW-SD) | Monocyte Count (MONO) |
| Red Blood Cell Distribution Width-standard deviation-CV | Eosinophil Count (EO) |
| Reticulocyte Number per Volume (RET#) | Basophil Count (BASO) |
| Percent Reticulocytes (RET %) | Neutrophil Percentage (NEUT %) |

**Table S8.** Complete blood counts of mice injected with saline vehicle (**Control group**, *n*=3),DOX alone(**Treatment group #1**,7 mg/kg/dose,cumulative dose 21 mg/kg, *n*=3), or DOX-C’ dots (**Treatment group #2**,7 mg/kg/dose, cumulative dose 21 mg/kg, *n*=3)

| **Test Name** | **Reference** | ***#1 Saline*** | ***#2 Saline*** | ***#3 Saline*** | ***#1***  ***DOX*** | ***#2***  ***DOX*** | ***#3***  ***DOX*** | ***#1***  ***DOX-C’ dots*** | ***#2***  ***DOX-C’ dots*** | ***#3***  ***Dox-C’ dots*** |
| --- | --- | --- | --- | --- | --- | --- | --- | --- | --- | --- |
| **Gender** |  | Male | Male | Female | Female | Female | Male | Female | Female | Female |
| **Sacrifice Day** |  | *9* | *9* | *9* | *10* | *10* | *15* | *12* | *15* | *15* |
|  |  |  |  |  |  |  |  |  |  |  |
| **RBC (M/uL)** | *7.14-12.20* | 8.85 | 9.76 | 8.54 | 7.37 | 8.08 | 8.78 | 8.68 | 8.55 | 8.01 |
| **HGB (g/dL)** | *10.8-19.2* | 13.8 | 15.8 | 14.3 | 11.6 | 13.0 | 13.40 | 14.3 | 14.30 | 13.60 |
| **HCT (%)** | *37.2-62.0* | 46.4 | 52.6 | 47.6 | 38 | 41.1 | 44.10 | 44.1 | 48.00 | 47.00 |
| **MCV (fL)** | *42.6-56.0* | 52.4 | 53.9 | 55.7 | 51.6 | 50.9 | 50.20 | 50.8 | 56.10 | 58.70 |
| **MCH (pg)** | *11.7-16.8* | 15.6 | 16.2 | 16.7 | 15.7 | 16.1 | 15.30 | 16.5 | 16.70 | 17.00 |
| **MCHC (g/dL)** | *24.6-35.9* | 29.7 | 30 | 30 | 30.5 | 31.6 | 30.40 | 32.4 | 29.80 | 28.90 |
| **RDW-SD (fL)** | *--* | 29.3 | 31.9 | 31.7 | 28.1 | 27.3 | 28.40 | 27.3 | 35.90 | 39.50 |
| **RDW-CV (%)** | *15.9-21.1* | 21.7 | 22.9 | 21.2 | 19.7 | 20.2 | 21.80 | 21.3 | 23.00 | 22.80 |
| **RET# (K/uL)** | *294-444* | 323 | 382.6 | 637.1 | **14.7** | **16.2** | **64.10** | **27.8** | 877.20 | 696.10 |
| **RET (%)** | *2.56-4.56* | 3.65 | 3.92 | 7.46 | 0.20 | 0.20 | 0.73 | 0.32 | 10.26 | 8.69 |
| **PLT (K/uL)** | *565-2159* | 858 | 657 | 645 | 1134 | 858 | 1209.00 | 661 | 866.00 | 839.00 |
| **PDW (fL)** | -- | 6.7 | 6.9 | 6.9 | 6.5 | 6.1 | 10.10 | 8.1 | 7.40 | 7.10 |
| **MPV (fL)** | *4.3-6.1* | 6.0 | 6.0 | 6.2 | 5.9 | 5.5 | 7.70 | 7.2 | 6.70 | 6.30 |
| **WBC# (K/uL)** | *3.90-13.96* | 2.95 | 8.56 | 5.78 | 5.86 | 5.52 | 10.39 | 6.24 | 4.99 | 4.46 |
| **NEUT# (K/uL)** | *0.42-3.09* | 1.14 | 1.36 | 0.47 | 0.82 | 0.66 | 6.59 | 0.94 | 1.24 | 0.59 |
| **LYMPH# (K/uL)** | *2.88-11.15* | 1.52 | 6.42 | 4.93 | 4.50 | 4.54 | 2.43 | 5.00 | 3.58 | 3.32 |
| **MONO# (K/uL)** | *0.15-0.94* | 0.29 | 0.69 | 0.31 | 0.52 | 0.31 | 1.37 | 0.28 | 0.14 | 0.41 |
| **EO# (K/uL)** | *0.01-0.50* | 0.00 | 0.09 | 0.07 | 0.02 | 0.01 | 0.00 | 0.01 | 0.02 | 0.13 |
| **BASO# (K/uL)** | *0.00-0.14* | 0.00 | 0.00 | 0.00 | 0.00 | 0.00 | 0.00 | 0.01 | 0.01 | 0.01 |
| **NEUT (%)** | *7.36-28.59* | 38.70 | 15.80 | 8.10 | 14.00 | 12.00 | 63.40 | 15.00 | 24.90 | 13.30 |
| **LYMPH (%)** | *61.26-87.12* | 51.50 | 75.00 | 85.30 | 76.80 | 82.20 | 23.40 | 80.10 | 71.70 | 74.40 |
| **MONO (%)** | *2.18-11.02* | 9.80 | 8.10 | 5.40 | 8.90 | 5.60 | 13.20 | 4.50 | 2.80 | 9.20 |
| **EO (%)** | *0.13-4.51* | 0.00 | 1.10 | 1.20 | 0.30 | 0.20 | 0.00 | 0.20 | 0.40 | 2.90 |
| **BASO (%)** | *0.01-1.26* | 0.00 | 0.00 | 0.00 | 0.00 | 0.00 | 0.00 | 0.20 | 0.20 | 0.20 |

**Table S9. List of serum chemistry parameters evaluated by toxicology**

| Blood Urea Nitrogen (BUN) | Albumin (ALB) |
| --- | --- |
| Creatinine (CREA) | Globulin (GLOB) |
| BUN/CREA Ratio | Albumin/Globulin (A/G) ratio) |
| Alkaline Phosphatase (ALP) | Phosphorus (P) |
| Alkaline Aminotransferase (ALT) | Calcium (CA) |
| Aspartate Aminotransferase (AST) | Glucose (GLU) |
| Gamma-Glutamyl Transferase (GGT) | Cholesterol (CHOL) |
| Direct Bilirubin (DBIL) | Triglycerides (TRIG) |
| Total Protein (TP) | Creatine Kinase (CK) |
| Total Carbon Dioxide (TCO2) | Chloride (Cl) |
| Sodium (Na) | Potassium (K) |
| Na/K Ratio | Anion gap |

**Table S10.** Complete metabolic profiles of female mice injected with saline vehicle (**Control group**, *n*=3), DOX alone (**Treatment group #1**, 7 mg/kg/dose, cumulative dose 21 mg/kg, *n*=3), or DOX-C’ dots (**Treatment group #2**, 7 mg/kg/dose, cumulative dose 21 mg/kg, *n*=3).

|  | **Sample** | ***Reference*** | ***#1***  ***Saline*** | ***#2***  ***Saline*** | ***#3***  ***Saline*** | ***#1***  ***DOX*** | ***#2***  ***DOX*** | ***#3***  ***DOX*** | ***#1***  ***DOX-C’ dots*** | ***#2***  ***DOX-C’ dots*** | ***#3***  ***DOX-C’ dots*** |
| --- | --- | --- | --- | --- | --- | --- | --- | --- | --- | --- | --- |
|  | **Gender** |  | M | M | F | F | F | M | F | F | F |
|  | **Sacrifice Day** |  | *9* | *9* | *9* | *10* | *10* | *15* | *15* | *15* | *12* |
| **Urinary function** | **BUN (mg/dL)** | *5.0-28* | 35.0 | 16.0 | 16.0 | 16.0 | 22.0 | 21.0 | 24 | 20 | 20 |
| **CREA (mg/dL)** | *0.2-0.5* | 0.18 | 0.16 | 0.22 | 0.22 | 0.2 | 0.16 | 0.21 | 0.23 | 0.14 |
| **BUN/CREA** | *-* | 194.4 | 100 | 72.7 | 72.7 | 110 | 181.3 | 114.3 | 87.0 | 142.9 |
| **Hepatic function** | **ALP (U/L)** | *105-370* | 121 | 115 | 128 | 142 | 145 | 52.0 | 155 | 133 | 155 |
| **ALT (U/L)** | *27-195* | 44.0 | 90.0 | 56.0 | 58.0 | 35 | 41.0 | 24.0 | 26.0 | 248 |
| **AST (U/L)** | *54-77* | 212 | 217 | 119 | 194 | 139 | 85.0 | 54.0 | 54.0 | 679 |
| **GGT (U/L)** | *-* | 0 | 0 | 0 | 0 | 0 | 0 | 0 | 0 | 0 |
| **DBIL (mg/dL)** | *-* | 0 | 0.1 | 0 | 0 | 0 | 0 | 0 | 0 | 0.2 |
| **TP (g/dL)** | *4.8-7.2* | 5.6 | 5.3 | 5.7 | 5.6 | 5.2 | 5.5 | 6.3 | 5.8 | 5.3 |
| **ALB (g/dL)** | *2.4-4.3* | 3.2 | 2.9 | 3.3 | 3.4 | 3.1 | 2.7 | 3.7 | 3.5 | 3.0 |
| **GLOB (g/dL)** | *1.7-2.2* | 2.4 | 2.4 | 2.4 | 2.2 | 2.1 | 2.8 | 2.6 | 2.3 | 2.3 |
| **A/G ratio** | *-* | 1.3 | 1.2 | 1.4 | 1.5 | 1.5 | 1.0 | 1.4 | 1.5 | 1.3 |
| **Metabolic profile** | **P (mg/dL)** | *7.3-14.5* | 6.9 | 9.0 | 8.9 | 9.8 | 9.1 | 8.5 | 9.9 | 9.8 | - |
| **Ca (mg/dL)** | *9.5-12.5* | 9.5 | 10.3 | 10.1 | 10.8 | 9.8 | 10.9 | 11.0 | 10.9 | - |
| **GLU (mg/dL)** | *172-372* | 139 | 137 | 138 | 178 | 184 | 176 | 224 | 244 | - |
| **CHOL (mg/dL)** | *55-169* | 113 | 62.0 | 91.0 | 87.0 | 103 | 111 | 88.0 | 70.0 | 84.0 |
| **TRIG (mg/dL)** | *67-289* | 75.0 | 40.0 | 72.0 | 100 | 75 | 95.0 | 62.0 | 80.0 | 67.0 |
| **CK (U/L)** | *428-1609* | 249 | 134 | 144 | 647 | 360 | 86.0 | 41.0 | 18.0 | - |
| **TCO2 (mEq/L)** | *-* | 30.0 | 35.0 | 27.0 | 28.0 | 27 | 14.0 | 18.0 | 14.0 | - |
| **Na (mEq/L)** | *145-181* | 158 | 158 | 154 | 166 | 155 | 160 | 157 | 157 | - |
| **K (mEq/L)** | *7.3-11.1* | 10.0 | 9.6 | 8.0 | 10.2 | 8.6 | 10.6 | 12.1 | 12.3 | - |
| **Cl (mEq/L)** | *111-134* | 115 | 109 | 109 | 118 | 110 | 113 | 115 | 115 | - |
| **Na/K ratio** | *-* | 16.0 | 16.0 | 19.0 | 16.0 | 18 | 15.0 | 13.0 | 13.0 | - |
| **Anion Gap** | *-* | 23.0 | 24.0 | 26.0 | 30.0 | 27 | 44.0 | 36.0 | 40.0 | - |

**Table S11.** Histopathology of triply-dosed tumor mice after *i.v.* injection of vehicle **(Control group**, *n*=3**),** DOX (**Treatment group #1**, 7 mg/kg/dose, cumulative dose 21 mg/kg, *n*=3) or DOX-C’ dots(**Treatment group #2**, 7 mg/kg/dose, cumulative dose 21 mg/kg, *n*=3).

| **Treatment** | **Gross**  **Examination** | **Histologic Finding(s)** | | | | | | |
| --- | --- | --- | --- | --- | --- | --- | --- | --- |
|  |  | ***Heart*** | ***Lungs*** | ***Liver*** | ***Kidneys*** | ***Spleen*** | ***Bone Marrow*** | ***Brain*** |
| **#1 Saline** | - *Lungs: Mottled, dark red, pink* - *Kidneys: Mottled, pale* | *N* | *Alveolar histoocytosis, MF, 2.* | *N* | *N* | ***N*** | *N* | - *Glioma, hemorrhage* |
| **#2 Saline** | - *No gross changes* | *N* | *N* | - *Hepatitis, neutrophilic, histiocytic, and lymphocytic, with apoptosis, random, MF, 2.* - *Hepatic arteriole hyperplasia, MF, 2.* - *Kupffer cell hemosiderosis, MF, 2.* | - *Tubular degeneration, and necrosis, F, UL, 1.* | *N* | *N* | - *Glioma, necrosis, hemorrhage* |
| **#3 Saline** | - *Liver: mild lobular pattern diffusely.* | *N* | *N* | - *Hepatitis, neutrophilic, histiocytic, lymphocytic, random, MF, 2.* | *N* | - *Red pulp,*   *erythroid*  *hematopoietic*  *hyperplasia.* | *N* | - *Glioma, hemorrhage* |
| **#1 DOX** | - *No gross changes* | *N* | *N* | - *Hepatitis, neutrophilic, histiocytic, and lymphocytic, with hepatocyte apoptosis, random, MF, 2.* | *N* | *N* | - *Decreased cellularity, inc M:E ratio* | - *Glioma, hemorrhage* |
| **#2 DOX** | - *No gross changes* | *IVS, myocardial histiocytic infiltrate, F, 3.* | *N* | *N* | *N* | *N* | - *Decreased cellularity, inc M:E ratio* | - *Glioma, necrosis, hemorrhage* |
| **#3 DOX** | - *No gross changes* | *N* | *NA* | *NA* | *NA* | *NA* | *NA* | - *Glioma* |
| **#1 DOX-C’ dots** | - *No gross changes* | *N* | *NA* | *NA* | *NA* | *NA* | - *Decreased cellularity, inc M:E ratio* | - *Glioma* |
| **#2 DOX-C’ dots** | - *No gross changes* | *N* | *NA* | *NA* | *NA* | *NA* | *N* | - *Glioma, hemorrhage* |
| **#3 DOX-C’ dots** | - *No gross changes* | *N* | *NA* | *NA* | *NA* | *NA* | *N* | - *Glioma, hemorrhage* |

***Legend:*** *N: Normal; F: Focal; MF: Multifocal; D: Diffuse; UL: Unilateral; BL: Bilateral; 1: Minimal; 2: Mild; 3: Moderate; 4: Marked; U: Unavailable; NA: Not applicable; LV: Left ventricle; RV: Right ventricle; LA: Left atrium; RA: Right atrium; IVS: Interventricular septum; M:E: Myeloid:erythroid*
